# Supplementary material for: Peripapillary retinal splitting visualized on OCT in glaucoma and glaucoma suspect patients
Source: PLoS One. 2017 Aug 23;12(8):e0182816. doi: 10.1371/journal.pone.0182816 (PMC5568282; doi:10.1371/journal.pone.0182816)
Supplement: S1 Table — (XLSX) [file pone.0182816.s001.xlsx]

## Sheet: Deidentified Patients NoSchisis
SNO	Eye	Schisis?	Gender	Diagnosis	IOP	sph	cyl	SER or V/A	CCT	Axial	C/D	α-PPA?	β-PPA?	Adhesion?	Traction?	MD	PSD
1	OD	0			13	N/A	N/A	CF @ 3'	N/A	N/A	0.86	1	0	0	0	-24.15	7.69
2	OS	0			15	N/A	N/A	20/25 ph	N/A	N/A	0.75	1	0	0	0	-4.69	4.92
3	OD	0			19	1	1.5	1.75	normal	N/A	0.75	1	1	1	0	0.03	1.71
4	OS	0			19	1.25	1	1.75	normal	N/A	0.7	1	1	0	0	-0.32	1.37
5	OD	0			13	-0.5	sphere	-0.5	N/A	N/A	0.83	1	1	0	0	-2.8	2.49
6	OS	0			16	1	sphere	1	N/A	N/A	0.71	1	1	0	0	-1.88	1.87
7	OD	0			15	0.5	0.75	0.875	N/A	22.76	0.64	1	0	0	0	-1.48	1.91
8	OS	0			17	1		1	N/A	23.9	0.75	1	1	0	0	-15.56	11.73
9	OD	0			18	N/A	N/A	20/25 -2	average	N/A	0.64	1	1	1	0	1.73	1.38
10	OS	0			17	N/A	N/A	20/15	average	N/A	0.42	1	1	1	0	1.04	1.8
11	OD	0			16	-5.25	1	-4.75	low	N/A	0.75	1	0	1	0	-12.7	10.43
12	OS	0			16	-5.75	1	-5.25	low	N/A	0.64	1	0	1	0	-10.93	8.63
13	OD	0			8	N/A	N/A	20/20 cc	low	N/A	0.725	1	0	1	0	0.62	2.28
14	OS	0			10	N/A	N/A	20/25 -1 sc	low	N/A	0.725	0	0	1	0	-0.85	1.92
15	OD	0			11	-2.5	0.5	-2.25	very low	N/A	0.93	1	1	0	0	-23.2	7.54
16	OS	0			12	-2.5	0.5	-2.25	very low	N/A	0.86	1	0	0	0	-20.33	10.31
17	OD	0			20	-0.25	0.75	0.125	N/A	N/A	0.78	1	0	1	0	-6.62	8.83
18	OS	0			10	Plano	2	1	N/A	N/A	0.67	1	0	1	0	-12.02	12.85
19	OD	0			21	-1.5	1.25	-0.875	avg/thick	N/A	0.62	1	0	1	0	1.45	1.33
20	OS	0			21	4	3.5	5.75	avg/thick	N/A	0.56	1	0	1	0	-0.16	1.69
21	OD	0			18	-1.75	1	-1.25	high	N/A	0.63	1	0	0	0	2.13	1.63
22	OS	0			19	-2	1.5	-1.25	high	N/A	0.6	0	0	0	0	1.88	1.7
23	OD	0			18	-2.75	sphere	-2.75	thick	N/A	0.7	1	0	1	0	-2.69	7.43
24	OS	0			21	-2.25	sphere	-2.25	thick	N/A	0.65	1	1	1	0	-1.62	4.7
25	OD	0			26	-1	0.75	-0.625	N/A	N/A	0.84	1	0	0	0	-26.29	10.77
26	OS	0			24	-0.75	0.5	-0.5	N/A	N/A	0.9	1	0	0	0	-32.87	4.18
27	OD	0			19	Plano		0	high	N/A	0.54	1	1	0	0	-4.67	4.88
28	OS	0			11	-2.25	0.5	-2	N/A	N/A	0.38	1	0	1	0	1.19	1.27
29	OD	0			15	plano	0.5	0.25	N/A	N/A	0.63	1	1	0	0	-4.95	6.44
30	OS	0			13	1	sphere	1	N/A	N/A	0.59	1	1	0	0	-1.12	4.91
31	OS	0			21	3	N/A	3	thick	N/A	0.8	1	0	0	0	-5.91	4.99
32	OD	0			27	3	N/A	3	N/A	N/A	0.99	1	0	0	0	-29	4.99
33	OS	0			17	3	N/A	3	N/A	N/A	0.7	1	1	0	1	0.05	2.45
34	OD	0			20	-4.75	N/A	-4.75	N/A	N/A	0.66	1	0	0	0	-0.99	1.34
35	OS	0			21	-3.5	N/A	-3.5	N/A	N/A	0.74	1	1	0	0	-7.67	12.58
36	OD	0			18	-7	1	-6.5	N/A	N/A	0.58	1	1	0	0	-3.2	5.34
37	OS	0			18	-6.75	N/A	-6.75	N	N/A	0.63	1	0	0	0	-1.98	1.83
38	OD	0			16	-6	N/A	-6	550	N/A	0.68	1	1	0	0	-0.45	1.33
39	OS	0			17	-7.25	N/A	-7.25	550	N/A	0.63	1	1	0	0	-1.99	2.08
40	OD	0			13	-8.25	2	-7.25	N/A	N/A	0.7	1	1	0	0	1.25	1.6
41	OS	0			16	-7.5	1.5	-6.75	N/A	N/A	0.73	1	0	0	0	1.57	1.77
42	OD	0			13	-1.5	0.25	-1.375	normal	N/A	0.79	1	0	1	0	-0.28	1.43
43	OS	0			13	-2	0.5	-1.75	normal	N/A	0.85	1	0	0	0	-1.56	2.76
44	OD	0			14	-7.75	1	-7.25	N/A	N/A	0.61	1	1	1	0	0.96	1.47
45	OS	0			15	-7		-7	N/A	N/A	0.67	1	0	1	0	-0.67	2.86
46	OD	0			13	-0.75	0.75	-0.375	average	N/A	0.65	1	0	1	0	1.88	1.48
47	OS	0			12	-0.5		-0.5	average	N/A	0.65	1	0	1	0	1.3	1.32
48	OD	0			4	-1	2.5	0.25	N/A	N/A	0.9	1	0	0	0	-8.96	10.92
49	OS	0			21	-1.75	0.25	-1.625	N/A	N/A	0.8	1	1	0	0	-1.19	2.32
50	OD	0			21	2	0.25	2.125	normal	N/A	0.72	1	0	0	0	-2.92	2
51	OS	0			18	2.25	0.25	2.375	normal	N/A	0.69	1	0	0	0	0.13	1.94
52	OD	0			15	-1.25	0.25	-1.125	N/A	N/A	0.77	1	0	0	0	1.19	1.36
53	OS	0			15	-1.25	0.5	-1	N/A	N/A	0.78	1	0	0	1	1.56	1.4
54	OD	0			16	-8		-8	N/A	N/A	0.84	1	0	0	0	-14.69	9.67
55	OS	0			15	-8.75		-8.75	N/A	N/A	0.88	1	0	0	0	-12.36	11.92
56	OD	0			20	1.5	2	2.5	610	N/A	0.08	1	0	0	0	0.04	1.56
57	OS	0			20	0.25	2	1.25	615	N/A	0.1	1	0	0	0	-0.25	1.76
58	OD	0			21	N/A	N/A	20/20 -1	thick	N/A	0.58	1	0	1	0	1.18	1.36
59	OS	0			15	N/A	N/A	20/20 - 1	thick	N/A	0.08	0	0	1	0	1.75	1.75
60	OD	0			20	-3.25		-3.25	high	N/A	0.56	1	0	1	0	-0.01	1.06
61	OS	0			20	-3.75	1.5	-3	high	N/A	0.52	1	0	1	0	-1.26	1.25
62	OD	0			13	N/A	N/A	20/25 -3	N/A	N/A	0.67	1	1	1	0	-3.38	6.9
63	OS	0			14	N/A	N/A	20/30 ph	N/A	N/A	0.64	1	0	1	0	-4.76	1.11
64	OD	0			19	2.25	1	2.75	average	N/A	0.57	1	0	1	0	0.89	-1
65	OS	0			18	2.25	0.75	2.625	average	N/A	0.38	1	0	0	0	1.6	3.01
66	OD	0			21	-5.5	0.75	-5.125	630	N/A	0.59	1	0	1	0	1.29	1.73
67	OS	0			22	-7	0.5	-6.75	630	N/A	0.65	1	1	1	0	-0.12	1.56
68	OD	0			14	-4.5		-4.75	thick	N/A	0.74	1	0	0	0	1.54	1.49
69	OS	0			13	-5.25		-5.375	thick	N/A	0.66	1	0	0	0	0.16	1.81
70	OD	0			19	2.75		2.75	N/A	N/A	0.87	1	0	1	0	-1.21	2.56
71	OS	0			19	2.75		2.75	N/A	N/A	0.83	1	0	1	0	-0.43	2.59
72	OD	0			13	-4	3.5	-2.25	slightly thick	N/A	0.49	1	1	0	0	-1.75	1.6
73	OS	0			12	-2.5	2.75	-1.125	s;ightly thick	N/A	0.54	1	0	0	0	-1.75	1.5
74	OD	0			23	N/A	N/A	20/30 -2 ph	N/A	N/A	0.67	1	0	1	0	-9.67	10.26
75	OS	0			18	N/A	N/A	20/30 -2	N/A	N/A	0.75	1	0	1	0	-11.72	11.25
76	OD	0			13	-7.5	1.5	-6.75	normal	25.59	0.78	1	1	0	0	-1.68	1.84
77	OS	0			14	-9.25	0.75	-8.875	normal	26.1	0.73	1	0	1	0	-2.5	2.23
78	OD	0			13	-0.75	2.25	0.375	N/A	N/A	0.74	1	0	0	0	-20.19	10.87
79	OS	0			13	-3.75	4.5	-1.5	N/A	N/A	0.65	1	0	0	0	-14.39	7.95
80	OD	0			21	N/A	N/A	20/20 +2	N/A	N/A	0.61	1	0	1	0	-0.34	1.67
81	OS	0			22	N/A	N/A	20/25 -2	N/A	N/A	0.6	1	1	1	0	-1.11	2.01
82	OD	0			18	1	0.25	1.125	N/A	N/A	0.69	1	1	1	0	1.11	1.58
83	OS	0			18	0.5	0.5	0.75	N/A	N/A	0.68	1	0	1	0	-1.76	3.02
84	OD	0			13	-2.5	1	-2	N/A	N/A	0.44	1	0	1	0	1.74	2.64
85	OD	0			15	2.25	-1.25	1.625	N/A	N/A	0.73	1	0	1	0	N/A	N/A
86	OD	0			15	-0.25	0.25	-0.125	565	N/A	0.78	1	0	0	0	0.32	1.56
87	OS	0			16	-1.25	0.75	-0.875	568	N/A	0.74	1	0	0	0	1.42	1.31
88	OD	0			12	-2.25	0.25	-2.125	high	N/A	0.75	1	0	0	0	-8.92	14.08
89	OS	0			12	-1.75	0.75	-1.375	high	N/A	0.68	1	1	0	0	-0.43	6.08
90	OD	0			22	N/A	N/A	20/20 -2	N/A	N/A	0.63	1	0	1	0	1.58	1.44
91	OS	0			22	N/A	N/A	20/20	N/A	N/A	0.82	1	0	1	0	-1.03	2.04
92	OD	0			5	-0.5	2.5	0.75	low	N/A	0.44	1	0	1	0	0.22	1.62
93	OS	0			4	-2.75	5	-0.25	low	N/A	0.58	1	0	1	0	-6.64	5.95
94	OD	0			12	-2	2.25	-0.875	N/A	N/A	0.48	1	0	1	0	-3.89	2.27
95	OS	0			13	-0.5	0.5	-0.25	N/A	N/A	0.47	1	0	0	0	-2.99	2.04
96	OD	0			26	-0.75	1.5	0	low	N/A	0.56	1	1	1	0	-5.74	1.45
97	OS	0			15	-1	1.25	-0.375	low	N/A	0.64	1	0	0	0	-4.45	1.52
98	OD	0			29	N/A	N/A	20/60 -2 ph	N/A	N/A	0.65	1	1	0	0	N/A	N/A
99	OS	0			30	N/A	N/A	20/50 -2 ph	N/A	N/A	0.72	1	0	0	0	N/A	N/A
100	OD	0			17	-1.75	1	-1.25	N/A	23.68	0.73	1	0	1	0	-10.06	13.29
101	OS	0			16	-1	0.5	-0.75	N/A	24.5	0.8	1	0	1	0	-12.96	13.86
102	OD	0			17	2	0.75	2.375	N/A	21	0.53	1	0	1	0	-1.18	1.71
103	OS	0			15	-0.5	2	0.5	N/A	24.98	0.83	1	1	1	0	-17.44	12.48
104	OD	0			17	Plano	1.25	0.625	N/A	N/A	0.73	1	0	0	0	-0.13	1.48
105	OS	0			17	Plano	0.5	0.25	N/A	N/A	0.72	1	0	0	0	-1.15	1.64
106	OD	0			21	-6	0.5	-5.75	520	N/A	0.6	1	0	1	0	0.15	1.16
107	OS	0			21	-6.25	0.75	-5.875	520	N/A	0.66	1	0	0	1	-0.47	1.54
108	OD	0			14	N/A	N/A	20/20 -1	low	N/A	0.84	1	0	0	0	1.61	2.63
109	OS	0			15	N/A	N/A	20/20 -1	low	N/A	0.75	1	0	1	0	1.4	1.91
110	OD	0			21	N/A	N/A	20/20 +2	N/A	N/A	0.45	1	0	1	0	1.37	1.55
111	OS	0			20	N/A	N/A	20/20 -3 ph	N/A	N/A	0.58	1	0	1	0	0.76	2.85
112	OD	0			13	-2.25	0.25	-2.125	N/A	N/A	0.68	1	0	1	0	1.7	1.78
113	OS	0			14	-2.25		-2.25	N/A	N/A	0.66	1	0	1	0	2.03	1.31
114	OS	0			14	-10	1.75	-9.125	high	N/A	0.59	1	0	0	1	-1.85	1.86
115	OD	0			18	-6	0.25	-5.875	normal	N/A	0.6	1	1	1	0	1.2	1
116	OS	0			17	-5		-5	normal	N/A	0.53	1	0	1	0	1.12	1.13
117	OD	0			24	Plano	0.5	0.25	543	N/A	0.85	1	1	0	0	-2.66	3.7
118	OD	0			16	N/A	N/A	20/25 -3 ph	N/A	N/A	0.76	1	1	0	0	-1.51	2.29
119	OD	0			28	-3.75	1.5	-3	N/A	N/A	0.8	1	0	0	0	-3.41	6.4
120	OS	0			18	-3.25	1.25	-2.625	N/A	N/A	0.82	1	0	0	0	-13.97	13.35
121	OD	0			21	1		1	high	N/A	0.57	1	0	1	0	1.83	1.37
122	OS	0			22	1.5		1.5	high	N/A	0.55	1	0	1	0	1.36	1.28
123	OD	0			24	-1.5		-1.5	average	N/A	0.31	1	0	0	0	-1.09	1.46
124	OS	0			23	-1.75	1	-1.25	average	N/A	0.1	1	0	0	0	-1.73	1.11
125	OD	0			11	-3.25	1.25	-2.625	normal	N/A	0.7	1	0	0	0	-12.94	15.96
126	OS	0			11	-3.25	0.75	-2.875	normal	N/A	0.7	1	0	1	0	-5.98	7.96
127	OD	0			16	-5.25	2.5	-4	N/A	N/A	0.79	1	0	1	0	-2.92	3.6
128	OS	0			13	-5	1.5	-4.25	N/A	N/A	0.67	1	0	1	0	-0.16	1.55
129	OD	0			10	-6.25	1	-5.75	low	N/A	0.6	1	1	0	0	-13.13	11.95
130	OS	0			9	-5.25	0.25	-5.125	low	N/A	0.6	1	1	0	0	-5.11	3.13
131	OD	0			19	-2		-2	average	N/A	0.63	1	0	0	0	0.66	1.81
132	OS	0			18	-1.25	0.75	-0.875	average	N/A	0.57	1	0	1	0	1.06	1.54
133	OS	0			12	0.5	1	1	N/A	N/A	0.54	1	1	0	0	-3.95	3.11
134	OD	0			13	0.75	0.25	0.875	low	N/A	0.78	1	1	0	0	-1.41	5.64
135	OS	0			14	0.5	0.25	0.625	low	N/A	0.65	1	1	0	0	0.28	1.69
136	OD	0			21	-7.5	0.75	-7.125	higher	N/A	0.74	1	0	1	0	-1.2	1.67
137	OS	0			21	-6.5	1	-6	higher	N/A	0.73	1	0	1	0	0.43	1.32
138	OD	0			18	N/A	N/A	20/20	high	N/A	0.22	1	0	1	0	-2.35	6.2
139	OS	0			19	N/A	N/A	20/20 -1	high	N/A	0.1	1	0	1	0	-1.76	4.72
140	OD	0			15	-0.75	1.5	0	N/A	N/A	0.8	1	1	0	0	-3.26	5.61
141	OS	0			20	-3	2.5	-1.75	N/A	N/A	0.91	1	0	0	0	-28.11	6.31
142	OD	0			18	N/A	N/A	20/30 -2	high-normal	N/A	0.65	1	0	1	0	-4.99	2.07
143	OD	0			21	-3.5	0.5	-3.25	low	N/A	0.3	1	1	1	0	0.51	1.36
144	OS	0			22	-6.5	0.5	-6.25	low	N/A	0.14	1	1	1	0	0.13	2.32
145	OS	0			17	-1.5	1	-1	high	N/A	0.79	?	0	0	0	-3.38	4.2
146	OD	0			11	N/A	N/A	20/25 -2	average	N/A	0.71	1	1	0	0	-0.16	1.81
147	OS	0			13	N/A	N/A	20/20 -1	average	N/A	0.76	1	1	0	0	-4.13	11.21
148	OD	0			17	-4.5	0.75	-4.125	570	25.39	0.52	1	1	1	0	0.9	1.67
149	OS	0			19	-4		-4	570	26.86	0.47	1	1	0	0	-1.08	1.6
150	OS	0			13	-1	0.25	-0.875	average	N/A	0.78	1	0	1	0	-8.62	6.24
151	OD	0			16	-1.25	0.75	-0.875	N/A	N/A	0.54	1	1	0	0	-3.36	3.8
152	OS	0			26	-1.25	1	-0.75	N/A	N/A	0.76	1	0	0	0	-22.83	10.56
153	OD	0			34	-1.75	2	-0.75	N/A	N/A	0.8	1	0	0	0	N/A	N/A
154	OS	0			32	-1	0.75	-0.625	N/A	N/A	0.5	1	0	1	0	N/A	N/A
155	OD	0			12	-2.75	0.75	-2.375	N/A	N/A	0.91	1	0	0	0	-24.44	10.95
156	OS	0			14	-2	0.5	-1.75	N/A	N/A	0.9	1	1	1	0	-13.56	11.33
157	OD	0			13	Plano		0	low	23.94	0.76	1	0	0	0	-9.2	8.98
158	OS	0			12	-0.75	0.25	-0.625	low	23.66	0.77	1	1	0	0	-20.73	10.4
159	OD	0			12	-5.75	0.75	-5.375	N/A	N/A	0.65	1	0	0	0	-2.09	2.61
160	OS	0			13	-4.5	0.5	-4.25	N/A	N/A	0.72	1	0	0	0	-3.65	5.1
161	OD	0			16	-0.25	1	0.25	N/A	N/A	0.77	1	0	0	0	-7.68	4.96
162	OD	0			18	-6.5	1.5	-5.75	N/A	N/A	0.43	1	0	1	0	0.45	1.45
163	OS	0			30	-7.25	1.75	-6.375	N/A	N/A	0.66	1	1	1	0	-1.23	1.36
164	OD	0			10	-2	0.5	-1.75	N/A	25.96	undefined	1	0	0	0	-3.9	2
165	OS	0			9	-1	0.75	-0.625	N/A	23.49	.6-.7	1	0	1	1	0.36	1.66
166	OD	0			19	3.25	0.75	3.625	N/A	N/A	0.11	1	1	0	0	N/A	N/A
167	OS	0			18	2	0.75	2.375	N/A	N/A	0.07	1	0	0	0	N/A	N/A
168	OD	0			18	-0.25	1.75	0.625	N/A	N/A	0.61	1	0	0	0	-6.27	4.51
169	OS	0			8	-0.5	0.5	-0.25	N/A	N/A	0.64	1	0	0	0	-7.97	2.55
170	OD	0			18	-2	2	-1	N/A	N/A	0.6	1	0	0	0	-3.9	3.91
171	OS	0			18	Plano	2	1	N/A	N/A	0.2	1	0	0	0	-1.83	2.64
172	OD	0			17	2		2	N/A	N/A	0.69	1	1	0	0	N/A	N/A
173	OS	0			16	2	0.5	2.25	N/A	N/A	0.57	1	0	0	0	N/A	N/A
174	OD	0			15	-7.5	1	-7	N/A	N/A	0.83	1	0	0	0	-9.2	7.97
175	OS	0			14	-6.5	1	-6	N/A	N/A	0.79	1	0	0	0	-15.59	10.95
176	OD	0			15	1.5	0.25	1.625	590	N/A	0.8	1	0	1	0	-2.13	1.98
177	OS	0			16	0.5	0.25	0.625	590	N/A	0.83	1	0	1	0	-4.8	2.56
178	OD	0			28	-3.5	1	-3	high	N/A	0.63	1	1	0	0	-2.66	3.71
179	OS	0			27	-3	0.75	-2.625	high	N/A	0.63	1	0	0	0	-2.07	1.77
180	OD	0			16	13.25	2	14.25	N/A	N/A	0.49	1	0	1	0	-1.5	4.86
181	OS	0			18	Balance		0	N/A	N/A	0.7	1	0	0	0	-14.37	8.48
182	OD	0			14	N/A	N/A	20/20	very low	N/A	0.66	1	0	1	0	-2.19	3.42
183	OS	0			12	N/A	N/A	20/20	very low	N/A	0.56	1	0	1	0	-1.76	1.73
184	OD	0			15	-3	2	-2	500	N/A	0.77	1	0	0	0	-17.65	10.03
185	OS	0			28	-1.75	1	-1.25	500	N/A	0.87	1	0	0	0	-27.93	4.98
186	OD	0			14	-5	1.75	-4.125	low	N/A	0.72	1	0	0	0	-5.19	7.76
187	OS	0			16	-4	2.25	-2.875	low	N/A	0.7	1	0	0	0	-1.34	1.55
188	OD	0			10	N/A	N/A	20/20 -3 ph	very low	N/A	0.72	1	1	1	0	-1.46	1.94
189	OS	0			11	N/A	N/A	20/20 -1	very low	N/A	0.77	1	0	0	0	-2.33	1.5
190	OD	0			14	-1	1.5	-0.25	518	N/A	0.84	1	0	1	0	N/A	N/A
191	OS	0			15	-1.5	0.5	-1.25	518	N/A	0.9	1	0	0	0	N/A	N/A
192	OD	0			16	-4.5	1.5	-3.75	N/A	N/A	0.71	1	1	1	0	-7.21	4.58
193	OS	0			6	-2.5	1.5	-1.75	N/A	N/A	0.11	1	0	0	0	-18.6	12
194	OD	0			17	1.5	1.5	2.25	thin	N/A	0.63	1	0	0	0	-15.2	11.28
195	OS	0			15	1	1.75	1.875	thin	N/A	0.73	1	0	0	0	-15.16	11.35
196	OD	0			14	0.5	1.25	1.125	average	N/A	0.89	1	1	0	0	-13.87	13.75
197	OS	0			11	0.75	0.5	1	average	N/A	0.78	1	1	0	0	1.14	1.25
198	OD	0			51	-6	0.75	-5.625	N/A	25.52	0.72	1	1	0	0	-24.16	9.15
199	OS	0			37	-6.75	0.75	-6.375	N/A	25.57	0.76	1	1	0	0	-3.6	3.45
200	OD	0			14	0.25	0.75	0.625	normal	N/A	0.67	1	0	0	0	-3.25	2.33
201	OS	0			16	0.25		0.25	normal	N/A	0.64	1	0	0	0	-1.61	1.81
202	OD	0			38	Plano		0	N/A	N/A	0.93	1	0	0	0	-30.86	3.21
203	OS	0			7	-1	1.75	-0.125	low	N/A	0.87	1	1	0	0	-15.87	8.78
204	OD	0			17	-1.5	1	-1	N/A	N/A	0.74	1	0	0	0	-14.85	8.74
205	OS	0			14	Balance		0	N/A	N/A	0.94	1	0	0	0	N/A	N/A
206	OD	0			40	-4.25	1	-3.75	average	24.83	0.86	1	0	0	0	-27.64	7.45
207	OS	0			37	-5.5	1	-5	average	25.32	0.87	1	0	1	0	-29.82	7.45
208	OD	0			12	N/A	N/A	20/30 ph	low	N/A	0.52	1	0	1	0	-16.56	8.66
209	OS	0			19	N/A	N/A	20/25 ph	low	N/A	0.5	1	0	1	0	-9.14	5.77
210	OS	0			12	-2.75		-2.75	N/A	N/A	0.82	1	1	1	0	-21.37	12.39
211	OD	0			16	-6.25	1	-5.75	high	N/A	0.64	1	0	0	0	0.87	1.6
212	OS	0			19	-6.25	1	-5.75	high	N/A	0.66	1	0	0	0	-0.09	1.41
213	OD	0			18	N/A	N/A	20/25 -2	high	N/A	0.51	1	0	1	0	-1.08	2.79
214	OS	0			17	N/A	N/A	20/25 -2	high	N/A	0.45	1	0	1	0	1.15	1.5
215	OD	0			18	1.75	0.75	2.125	higher than avg.	N/A	0.7	1	0	1	0	2.17	1.25
216	OS	0			21	2.25	0.75	2.625	higher than avg.	N/A	0.77	1	0	1	0	0.34	1.56
217	OD	0			20	-0.75	0.5	-0.5	avg/thick	N/A	0.8	1	0	1	0	-0.35	1.89
218	OS	0			22	0.5	0.75	0.875	avg/thick	N/A	0.77	1	0	1	0	0.09	2.06
219	OD	0			32	N/A	N/A	20/20	high	N/A	0.4	1	0	1	0	N/A	N/A
220	OS	0			29	N/A	N/A	20/20	high	N/A	0.36	1	1	1	0	N/A	N/A
221	OS	0			14	Plano		0	N/A	N/A	0.35	1	0	0	0	-1.16	1.7
222	OD	0			23	-5.25	1.25	-4.625	thick	N/A	0.68	1	0	0	0	N/A	N/A
223	OS	0			19	-3.5	2	-2.5	thick	N/A	0.57	1	0	0	0	N/A	N/A
224	OD	0			11	-0.75	1	-0.25	N/A	N/A	0.79	1	1	0	0	-3.42	5.33
225	OS	0			9	1	1.25	1.625	N/A	N/A	0.76	1	1	0	0	-4.34	7.3
226	OD	0			16	-3.75	1.5	-3	normal	N/A	0.36	1	1	0	0	-1.09	1.73
227	OS	0			17	-3.25	1.25	-2.625	normal	N/A	0.54	1	0	0	0	-1.64	1.87
228	OD	0			15	-3.5	0.75	-3.125	low	N/A	0.77	1	0	0	0	0.98	1.48
229	OS	0			13	-2	0.25	-1.875	low	N/A	0.86	1	0	0	0	-4.71	3.07
230	OD	0			23	-7.75	0.75	-7.375	N/A	N/A	0.92	1	0	0	0	-23.78	12.11
231	OS	0			18	-12	1.5	-11.25	N/A	N/A	0.77	1	0	0	0	-12.77	10.72
232	OD	0			15	N/A	N/A	20/20 -2	N/A	N/A	0.55	1	0	0	0	-1.89	1.84
233	OS	0			17	N/A	N/A	20/30 ph	N/A	N/A	0.66	1	0	1	0	-2.72	2.05
234	OD	0			14	-7.5	2	-6.5	low	N/A	0.66	1	0	0	0	0.77	1.55
235	OS	0			12	-3.25	0.25	-3.125	low	N/A	0.68	1	0	0	0	-0.33	1.54
236	OD	0			15	-1.75	1	-1.25	530	N/A	0.87	1	0	1	0	-18.21	13.6
237	OS	0			15	-0.5	1	0	530	N/A	0.9	1	1	1	0	-12.6	13.5
238	OD	0			13	-1.5	0.5	-1.25	N/A	N/A	0.85	1	0	0	0	-8.63	12.73
239	OS	0			14	-1	0.5	-0.75	N/A	N/A	0.63	1	0	0	0	-0.14	2.13
240	OD	0			16	-5.75	sphere		N/A	24.71	0.54	1	1	0	0	N/A	N/A
241	OS	0			16	-6.5	0.75	-6.125	N/A	25.78	0.09	1	1	0	1	N/A	N/A
242	OD	0			10	N/A	N/A	20/50 ph	low	N/A	0.68	1	0	0	0	-5.54	3.48
243	OS	0			8	N/A	N/A	20/25 -2	low	N/A	0.52	N/A	0	0	0	0.35	1.44
244	OD	0			27	1.75	0.75	2.125	N/A	N/A	0.36	1	0	1	0	-2.29	2.68
245	OS	0			21	2	1.25	2.625	N/A	N/A	0.16	1	0	1	0	-6.84	3.49
246	OD	0			12	-1.5	1.25	-0.875	N/A	N/A	0.72	1	0	1	0	1.51	1.47
247	OS	0			13	-2.25	2.5	-1	N/A	N/A	0.91	1	0	1	0	N/A	N/A
248	OD	0			16	0.75	1	1.25	low avg	N/A	0.68	1	0	1	0	-0.43	1.29
249	OS	0			15	1.75	sphere	1.75	low avg	N/A	0.68	1	0	1	0	-2.13	2.48
250	OD	0			19	N/A	N/A	20/25 +1	high	N/A	0.66	1	0	1	0	-0.76	2.81
251	OS	0			18	N/A	N/A	20/20 -1	high	N/A	0.69	1	0	1	0	-1.19	2.15
252	OD	0			14	-1.75	1	-1.25	low	N/A	0.66	1	0	0	0	2.02	1.82
253	OS	0			14	-1.25	1.5	-0.5	low	N/A	0.75	1	0	0	0	-1.53	5.66
254	OD	0			19	-4.75	1	-4.25	N/A	N/A	0.63	1	0	1	0	2.4	1.4
255	OS	0			25	-3.5	0.5	-3.25	N/A	N/A	0.72	1	0	1	0	2	1.56
256	OD	0			16	-0.75		-0.75	N/A	N/A	0.06	1	0	0	0	N/A	N/A
257	OS	0			17	-0.5	5	2	N/A	N/A	0.07	1	0	0	0	N/A	N/A
258	OD	0			13	-0.5	1	0	N/A	N/A	0.62	1	0	1	0	-23.05	12.83
259	OS	0			15	-0.75	0.75	-0.375	N/A	N/A	0.77	1	0	0	0	-22.1	11.7
260	OD	0			19	-6.5	1.25	-5.875	slightly thin	N/A	0.87	1	0	1	0	-20.2	13.86
261	OS	0			18	-8	0.25	-7.875	slightly thin	N/A	0.84	1	0	0	0	-14.93	13.85
262	OD	0			17	3.25	1.25	3.875	normal	N/A	0.67	1	0	1	0	0.67	1.1
263	OS	0			20	4	0.5	4.25	normal	N/A	0.74	1	0	1	0	-1.31	1.5
264	OD	0			18	-1.25	0.75	-0.875	N/A	N/A	0.57	1	1	0	0	2.1	2.04
265	OS	0			20	-1.25	0.75	-0.875	N/A	N/A	0.58	1	1	0	0	0.98	1.43
266	OD	0			24	Plano	0.5	0.25	thick	N/A	0.76	1	0	0	0	-18.34	12.53
267	OS	0			25	0.5	1	1	thick	N/A	0.67	1	0	0	0	-6.25	9.1
268	OD	0			13	-1	sphere	-1	average	24.32	0.84	1	0	0	0	-1.16	1.45
269	OS	0			12	-1	sphere	-1	average	24.36	0.83	1	0	0	0	-2.46	2.52
270	OD	0			15	-3	0.25	-2.875	N/A	25.32	0.74	1	0	1	0	-2.73	2.2
271	OS	0			15	-5	0.5	-4.75	N/A	25.83	0.78	1	0	1	0	-4.03	1.82
272	OD	0			14	N/A	N/A	20/60-1 +2	464	N/A	0.92	1	0	0	0	N/A	N/A
273	OS	0			10	N/A	N/A	20/60ecc +1	465	N/A	0.92	1	0	0	0	N/A	N/A
274	OD	0			8	-0.75	0.5	-0.5	low	N/A	0.77	1	0	1	0	-5.17	10.73
275	OS	0			9	-0.25	0.25	-0.125	low	N/A	0.83	1	0	1	0	-5.37	4.53
276	OD	0			13	-3	1.5	-2.25	N/A	25.17	0.7	1	1	1	0	-2.59	4.75
277	OS	0			13	-4.75	0.5	-4.5	N/A	25.54	0.63	1	1	1	0	-3.88	3.2
278	OD	0			15	N/A	N/A	20/20 ph	N/A	N/A	0.75	1	0	0	0	N/A	N/A
279	OS	0			30	N/A	N/A	20/40 +2	N/A	N/A	0.85	1	0	0	0	N/A	N/A
280	OD	0			19	-0.5		-0.5	normal	N/A	0.3	1	0	1	0	1.75	1.8
281	OS	0			15	-1.25	0.75	-0.875	normal	N/A	0.72	1	0	0	0	-12.65	12.79
282	OD	0			11	-5.75	0.5	-5.5	very low	N/A	0.95	1	0	0	0	-29.34	8.13
283	OS	0			8	-5.25	1	-4.75	very low	N/A	0.68	1	0	1	0	-1.38	2.18
284	OD	0			8	-0.75		-0.75	low	N/A	0.83	1	1	0	0	-4.73	7.84
285	OS	0			10	-3		-3	low	N/A	0.92	1	1	0	0	-29.54	4.86
286	OD	0			15	-1	1	-0.5	average	23.9	0.52	1	0	0	0	-11.67	10.91
287	OS	0			16	-2.25	1	-1.75	average	24.31	0.63	1	0	0	0	-4.21	2.61
288	OD	0			15	2.5	sphere	2.5	average	N/A	0.16	1	1	0	0	-1.15	1.81
289	OS	0			22	2.5	sphere	2.5	average	N/A	0.66	1	1	0	0	-14.5	9.9
290	OD	0			13	0.5	sphere	0.5	N/A	N/A	0.8	1	1	0	0	-9.19	4.46
291	OS	0			12	-1.5	0.5	-1.25	N/A	N/A	0.69	1	1	0	0	-2.44	2.06
292	OD	0			16	-1.75	0.75	-1.375	N/A	N/A	0.71	1	1	0	0	0.38	0.61
293	OS	0			14	-1.75	0.75	-1.375	N/A	N/A	0.69	1	0	1	0	1.67	1.53
294	OD	0			10	-0.5	0.75	-0.125	N/A	N/A	0.87	1	0	1	0	-16.65	13.02
295	OS	0			23	-0.5	sphere	-0.5	N/A	N/A	0.87	1	1	1	0	-19.78	8.49
296	OD	0			17	-2.25		-2.25	N/A	N/A	0.72	1	1	0	0	-4.34	3.52
297	OS	0			17	-1.5	1	-1	N/A	N/A	0.68	1	0	0	0	-3.21	2.13
298	OD	0			17	-3	4	-1	thin	N/A	0.9	1	1	0	0	-4.85	3.91
299	OS	0			20	-1.5	2.25	-0.375	thin	N/A	0.85	1	0	1	0	-5.87	6.6
300	OD	0			18	-0.5	0.5	-0.25	N/A	N/A	0.85	1	0	0	0	-9.22	12.95
301	OS	0			15	0.5	0.5	0.75	N/A	N/A	0.85	1	1	1	?	-1.01	5.87
302	OD	0			11	-0.75	1.25	-0.125	wnl	N/A	0.41	1	0	0	0	-0.12	1.68
303	OS	0			10	1	1.5	1.75	wnl	N/A	0.43	1	0	1	0	-1.17	1.86
304	OD	0			16	-0.5	0.5	-0.25	mild thin	N/A	0.8	1	0	0	0	-8.15	6.57
305	OS	0			14	plano		0	mild thin	N/A	0.7	1	0	1	0	-2.86	3.04
306	OD	0			22	-1	0.5	-0.75	N/A	N/A	0.15	1	0	1	0	-6.54	3.76
307	OS	0			18	Plano	0.75	0.375	N/A	N/A	0.15	1	1	1	0	-8.01	2.45
308	OD	0			15	-3.75	0.5	-3.5	N/A	N/A	0.6	1	1	0	0	-2.85	4.24
309	OS	0			16	-3.75	0.25	-3.625	N/A	N/A	0.51	1	0	0	0	-1.16	2.63
310	OD	0			16	-7.75	1	-7.25	low	N/A	0.51	1	0	0	0	0.64	1.63
311	OS	0			17	-6.5	1	-6	low	N/A	0.49	1	0	0	0	-0.71	1.63
312	OD	0			18	-0.75	0.75	-0.375	low	N/A	0.72	1	0	1	0	0.22	1.3
313	OS	0			18	-0.75	1	-0.25	low	N/A	0.72	1	0	0	0	-5.52	6.43
314	OD	0			13	0.25		0.25	N/A	22.35	0.7	1	1	0	0	-3.88	2.19
315	OS	0			17	2.25	1	2.75	N/A	22.43	0.66	1	0	0	1	0.13	1.65
316	OD	0			17	1	1	1.5	low	N/A	0.85	1	0	1	0	-9.38	10.16
317	OS	0			20	0.75	0.5	1	low	N/A	0.75	1	0	1	0	-1.89	3.88
318	OD	0			12	-5.25	0.5	-5	average	N/A	0.43	1	0	1	0	-2.53	2.01
319	OS	0			12	-5.25	0.75	-4.875	average	N/A	0.35	1	0	1	0	-2.89	1.23
320	OD	0			12	1.75		1.75	N/A	N/A	0.66	1	1	1	0	-1.12	1.76
321	OS	0			14	1.25	0.5	1.5	N/A	N/A	0.79	1	0	1	0	-5.27	6.08
322	OD	0			15	-5.5	3.5	-3.75	N/A	N/A	0.85	1	1	0	0	-7.51	14.51
323	OS	0			15	-3.75	2.75	-2.375	N/A	N/A	0.79	1	1	0	0	-4.05	6.86
324	OD	0			16	2.75	1	3.25	N/A	N/A	0.46	1	0	0	0	-2.11	2.74
325	OS	0			17	plano	1.75	0.875	N/A	N/A	0.53	1	1	0	0	-2.96	1.66
326	OS	0			19	-0.5	sphere	-0.5	low	N/A	0.32	1	0	1	0	-4.64	6.49
327	OD	0			14	-3	1.25	-2.375	moderate	N/A	0.71	1	0	0	0	1.63	1.64
328	OS	0			15	-3	1	-2.5	moderate	N/A	0.81	1	0	0	0	-0.13	1.8
329	OD	0			24	-2	1.75	-1.125	mildly thin	N/A	0.76	1	0	1	0	2.24	1.47
330	OS	0			22	-1.75	0.5	-1.5	mildly thin	N/A	0.77	1	0	1	0	2.41	1.37
331	OD	0			15	-11	0.5	-10.75	N/A	N/A	0.73	1	1	0	0	-6.25	11.1
332	OS	0			14	-13	1	-12.5	N/A	N/A	0.68	1	1	0	0	-3.19	2.33
333	OD	0			21	-0.25	2	0.75	N/A	N/A	0.78	1	0	0	0	-9.36	10.38
334	OS	0			20	1	1.75	1.875	N/A	N/A	0.77	1	1	0	0	-5.89	7.69
335	OD	0			10	-6.5	2.5	-5.25	N/A	N/A	0.85	1	0	0	0	-1.58	2.13
336	OS	0			14	balance		0	N/A	N/A	0.99	1	0	0	0	-28.58	7.25
337	OD	0			13	N/A	N/A	20/25 cc	N/A	N/A	0.53	1	0	1	0	-3.39	1.19
338	OS	0			22	N/A	N/A	20/25 sc	N/A	N/A	0.7	1	1	1	0	-16.03	10.81
339	OD	0			13	-1.25		-1.25	low	N/A	0.72	1	0	0	0	0.07	1.45
340	OS	0			12	-0.75		-0.75	low	N/A	0.71	1	0	0	0	0.27	1.9
341	OD	0			22	1	sphere	1	N/A	N/A	0.61	1	0	0	0	-4.23	6.42
342	OS	0			19	1	sphere	1	N/A	N/A	0.62	1	0	1	0	-0.49	1.82
343	OD	0			25	-3.25	3.75	-1.375	thick	23.84	0.47	1	0	1	0	1.41	1.77
344	OS	0			21	-0.5	0.75	-0.125	thick	23.21	0.37	1	0	1	0	0.9	2.04
345	OD	0			13	-1.75	2.25	-0.625	N/A	N/A	0.88	1	0	1	0	-13.5	9.7
346	OS	0			15	-0.25	1.5	0.5	N/A	N/A	0.8	1	1	1	0	-1.63	1.87
347	OD	0			10	-1	2	0	N/A	N/A	0.9	1	0	0	0	-23.3	8.52
348	OS	0			16	-0.25	1.5	0.5	N/A	N/A	0.83	1	1	0	0	-9.25	7.22
349	OD	0			11	1.5	0.5	1.75	average	N/A	0.74	1	0	1	0	-4.92	11.84
350	OS	0			11	2.25	0.5	2.5	average	N/A	0.8	1	0	1	0	-10.79	16.35
351	OD	0			17	-2.75	0.75	-2.375	high	N/A	0.41	1	0	0	0	0.59	1.44
352	OS	0			19	-3.25	0.75	-2.875	high	N/A	0.47	1	1	0	0	1.41	1.27
353	OD	0			13	-1	1.25	-0.375	N/A	N/A	0.77	1	0	0	0	-9.2	14.88
354	OS	0			14	-0.5	1	0	N/A	N/A	0.7	1	0	0	0	0.9	1.66
355	OD	0			15	0.5	1.5	1.25	N/A	N/A	0.51	1	1	1	0	1.8	1.51
356	OS	0			16	1.25	1	1.75	N/A	N/A	0.4	1	0	0	1	2.22	2.24
357	OD	0			13	-4	1.25	-3.375	570	N/A	0.11	1	1	0	0	0.36	1.85
358	OS	0			16	-4.5	1.25	-3.875	570	N/A	0.54	1	0	0	0	-1.44	5.58
359	OD	0			11	-1.25	1.25	-0.625	N/A	26.89	0.74	1	1	0	0	-2.77	1.85
360	OS	0			9	-2	2	-1	N/A	27.3	0.76	1	1	0	0	-4.93	3.04
361	OD	0			16	-8.5	sphere	-8.5	above avg.	N/A	0.76	1	1	0	0	-8.39	11
362	OS	0			17	-8.75	0.25	-8.625	above avg.	N/A	0.71	1	0	0	0	-1.02	2.29
363	OD	0			13	-12.25	4	-10.25	low	N/A	0.92	1	0	0	0	-6.4	9.05
364	OS	0			14	-13.25	2.75	-11.875	low	N/A	0.87	1	0	0	0	-5.13	6.75
365	OD	0			19	-8	2.25	-6.875	below avg	N/A	0.56	1	1	0	0	-0.02	1.76
366	OS	0			19	-7.5	2	-6.5	below avg	N/A	0.32	1	1	0	0	-1.79	1.99
367	OD	0			12	-1.25	0.25	-1.125	sl. above avg.	N/A	76	1	0	0	0	0.81	1.77
368	OS	0			12	-1	sphere	-1	sl. above avg.	N/A	0.79	1	0	0	0	-0.61	1.7
369	OS	0			15	-2.5	0.75	-2.125	average	N/A	0.56	1	0	0	0	N/A	N/A
370	OD	0			14	2.5		2.5	avg/thin	N/A	0.65	1	1	0	0	0.57	2.34
371	OS	0			14	2.5		2.5	avg/thin	N/A	0.85	1	1	0	0	-1.56	3.76
372	OD	0			12	-2.5	1.25	-1.875	normal	N/A	0.72	1	0	0	1	-1.93	2.31
373	OS	0			12	-2	0.75	-1.625	sl. Thin	N/A	0.66	1	0	0	1	-2.3	2.05
374	OD	0			12	-1		-1	average	N/A	0.25	1	0	1	0	1.06	1.29
375	OD	0			17	-0.25	0.75	0.125	N/A	N/A	0.79	1	0	0	0	-1.78	1.43
376	OS	0			16	-0.25	0.5	0	N/A	N/A	0.6	1	1	0	0	-0.93	1.11
377	OD	0			16	2.5	0.75	2.875	N/A	N/A	0.82	1	0	1	0	-15.16	11.63
378	OS	0			17	2	1	2.5	N/A	N/A	0.81	1	0	1	0	-7.56	3.2
379	OD	0			12	-1.25	0.75	-0.875	low	N/A	0.83	1	0	1	0	-0.09	2.11
380	OS	0			11	-1.5	1	-1	low	N/A	0.94	1	0	1	0	-18.46	15.39
381	OD	0			17	balance			N/A	N/A	0.79	1	0	0	0	-22.16	6.14
382	OS	0			16	-3	0.5	-2.75	N/A	N/A	0.25	1	0	0	0	-9.28	4.68
383	OD	0			16	-1.5	1	-1	N/A	N/A	0.74	1	0	0	0	-10.06	6.27
384	OS	0			14	2	0.25	2.125	N/A	N/A	0.68	1	0	1	0	-5.07	6.21
385	OD	0			19	2.5	sphere	2.5	N/A	N/A	0.71	1	0	0	0	0.31	1.47
386	OS	0			18	2.5	sphere	2.5	N/A	N/A	0.68	1	0	1	0	-0.9	1.83
387	OD	0			10	-0.5	1	0	sl. thin	21.2	0.85	1	0	0	0	-14.86	7.01
388	OS	0			7	sphere		0	sl. Thin	23.93	0.81	1	0	0	0	-22.51	8.55
389	OD	0			32	-4.75	1.5	-4	very high	N/A	0.65	1	1	0	0	2.63	4.88
390	OS	0			31	-4.25	0.75	-3.875	very high	N/A	0.77	1	1	0	0	-1.33	3.73
391	OD	0			23	-5.24	0.5	-4.99	N/A	N/A	0.39	1	0	1	0	-0.78	1.55
392	OS	0			22	-5	0.25	-4.875	N/A	N/A	0.42	1	0	1	0	-1.16	1.51
393	OD	0			15	-1.75	0.75	-1.375	N/A	N/A	0.46	1	0	0	0	0.5	1.62
394	OS	0			18	-1.5	0.5	-1.25	N/A	N/A	0.73	1	0	0	0	-1.65	2.28
395	OD	0			23	1.5	1.5	2.25	531	N/A	0.59	1	0	0	0	0.78	1.34
396	OS	0			23	0.75	1.25	1.375	531	N/A	0.68	1	0	0	0	0.28	1.16
397	OD	0			12	-0.25	0.75	0.125	530	N/A	0.77	1	0	0	0	-2.16	3
398	OS	0			13	-0.25	0.25	-0.125	530	N/A	0.63	1	0	1	0	0.74	1.5
399	OD	0			14	2.5		2.5	low	N/A	0.66	1	0	1	0	-1.61	1.38
400	OS	0			12	2.5		2.5	low	N/A	0.69	1	0	0	0	-12.03	13.63
401	OS	0			12	0.25	0.75	0.625	N/A	N/A	0.83	1	0	0	0	0.15	1.08
402	OD	0			12	1	1.75	1.875	525	N/A	0.86	1	0	1	0	-1.32	1.81
403	OS	0			11	1.25	2.25	2.375	529	N/A	0.92	1	0	1	0	-0.62	1.58
404	OD	0			13	-11.75	2.25	-10.625	N/A	N/A	0.75	1	0	0	0	-11.45	12.21
405	OS	0			11	-13.5	1.75	-12.625	N/A	N/A	0.43	1	1	0	0	0.17	1.97
406	OD	0			18	1.25		1.25	507	N/A	0.62	1	0	1	0	-1.34	2.26
407	OS	0			19	2	0.25	2.125	507	N/A	0.62	1	0	1	0	0.51	2.16
408	OD	0			19	-9.75	1.25	-9.125	590	N/A	0.74	1	1	1	0	-1.35	1.52
409	OS	0			30	-9.5	0.75	-9.125	590	N/A	0.79	1	1	1	0	-2.4	1.59
410	OD	0			14	-1.5		-1.5	average	N/A	0.71	1	0	0	0	-0.9	1.86
411	OS	0			12	-1	0.5	-0.75	average	N/A	0.85	1	0	0	0	-7.17	9.42
412	OD	0			12	0.5	0.75	0.875	low	N/A	0.74	1	0	0	0	0.21	1.21
413	OS	0			12	-0.25	0.75	0.125	low	N/A	0.88	1	0	0	0	-3.19	4.01
414	OD	0			11	-4.25	0.5	-4	N/A	26.4	0.65	1	1	1	0	-1.63	1.8
415	OS	0			11	-6	0.75	-5.625	N/A	24.64	0.52	1	1	1	0	-1.4	2
416	OD	0			18	-2	1.5	-1.25	N/A	N/A	0.5	1	1	0	0	-2.93	3
417	OS	0			14	-1	1.75	-0.125	N/A	N/A	0.86	1	0	0	0	-10.51	5.73
418	OD	0			13	-0.5	1	0	N/A	N/A	0.7	1	0	0	0	1.67	1.74
419	OS	0			12	-1.25	1	-0.75	N/A	N/A	0.64	1	0	0	0	0.3	1.74
420	OD	0			16	N/A	N/A	20/15	average	N/A	0.62	1	1	1	0	-2.19	1.75
421	OS	0			17	N/A	N/A	CF at 3'	average	N/A	0.71	1	0	0	0	-21.35	7.56
422	OD	0			16	1.75	0.75	2.125	N/A	N/A	0.67	1	0	0	0	-1.34	2.97
423	OS	0			17	1.5	0.75	1.875	N/A	N/A	0.62	1	0	1	0	-0.22	2.04
424	OD	0			12	-0.75	sphere		N/A	N/A	0.79	1	0	1	0	-2.32	3.76
425	OS	0			5	-2	1.5	-1.25	N/A	N/A	0.82	1	0	1	0	-29.3	9.16
426	OD	0			14	-3.5	1.25	-2.875	low	N/A	0.65	1	0	0	0	-0.49	1.29
427	OS	0			16	-2.75	0.75	-2.375	low	N/A	0.69	1	0	0	0	-1.19	1.73
428	OD	0			14	-0.5	0.75	-0.125	N/A	N/A	0.91	1	1	0	0	-10.66	10.42
429	OS	0			16	-0.5	0.75	-0.125	N/A	N/A	0.85	1	0	0	0	-11.58	10.11
430	OD	0			16	plano		0	N/A	N/A	0.7	1	0	0	0	-2.05	1.58
431	OS	0			20	plano		0	N/A	N/A	0.9	1	0	0	0	-16.14	12.33
432	OD	0			15	-0.25	1	0.25	N/A	N/A	0.85	1	0	1	0	-6.7	4.07
433	OS	0			14	0.25	1	0.75	N/A	N/A	0.84	1	0	1	0	-7.75	6.52
434	OD	0			14	N/A	N/A	20/20	N/A	N/A	0.21	1	0	1	0	0.78	1.1
435	OS	0			15	N/A	N/A	20/25 ph	N/A	N/A	0.24	1	0	1	0	-1.86	1.45
436	OD	0			16	plano	1.25	0.625	average	N/A	0.67	1	0	1	0	-2.42	3.73
437	OS	0			16	1	1.5	1.75	average	N/A	0.66	1	0	1	0	-1.02	2.01
438	OD	0			12	-1.25	0.75	-0.875	N/A	N/A	0.5	1	0	0	0	0.05	2.19
439	OS	0			13	-1.75	0.75	-1.375	N/A	N/A	0.52	1	0	0	0	-1.61	1.75
440	OD	0			20	-1		-1	N/A	N/A	0.63	1	0	1	0	N/A	N/A
441	OS	0			21	Plano		0	N/A	N/A	0.65	1	0	1	0	N/A	N/A
442	OD	0			14	-1	1	-0.5	N/A	N/A	0.73	1	0	0	0	-11.56	9.53
443	OS	0			15	-1	1	-0.5	N/A	N/A	0.63	1	0	0	0	-1.1	1.9
444	OD	0			11	1.5	2.5	2.75	N/A	N/A	0.79	1	0	0	0	-6.98	5.7
445	OS	0			9	2	0.25	2.125	N/A	N/A	0.79	1	0	0	0	-15.07	12.06
446	OD	0			20	-9.25	Sph	-9.25	normal	N/A	0.77	1	1	0	0	0.72	1.35
447	OS	0			17	-11.25	Sph	-11.25	normal	N/A	0.84	1	0	0	0	-2.51	3.93
448	OD	0			12	N/A	N/A	20/15	low	N/A	0.85	1	0	1	0	-3.87	1.97
449	OS	0			11	N/A	N/A	20/30 -3 ph	low	N/A	0.9	1	0	1	0	-7.28	7.26
450	OD	0			19	-0.25	0.75	0.125	N/A	N/A	0.63	1	0	0	0	0.13	2.25
451	OS	0			19	plano	0.25	0.125	N/A	N/A	0.68	1	0	0	0	-1.49	2.7
452	OD	0			20	-3.75	1	-3.25	high	N/A	0.69	1	0	0	0	-0.84	1.91
453	OS	0			24	-5	1	-4.5	high	N/A	0.64	1	0	0	0	0.48	2.46
454	OD	0			11	-1.25	1	-0.75	N/A	N/A	0.59	1	1	0	0	-1.26	2.16
455	OS	0			11	-2.25	2.25	-1.125	N/A	N/A	0.73	1	0	0	0	-7.5	9.28
456	OD	0			14	-9	1.5	-8.25	normal	N/A	0.81	1	0	1	0	-33.16	3.21
457	OS	0			8	-9.25	1.5	-8.5	normal	N/A	0.69	1	0	1	0	-31.82	5.97
458	OD	0			22	-4.25	0.75	-3.875	N/A	N/A	0.72	1	1	0	0	1	1.69
459	OS	0			21	-4.25	0.5	-4	N/A	N/A	0.72	1	1	0	0	1.5	1.13
460	OD	0			15	2.75	0.5	3	N/A	N/A	0.74	1	0	1	0	-5.73	2.13
461	OS	0			14	2.5	0.5	2.75	N/A	N/A	0.73	1	0	1	0	-5.67	2.53
462	OD	0			14	-1.75	0.5	-1.5	high	N/A	0.7	1	1	0	0	-1.31	1.72
463	OS	0			14	-1	0.5	-0.75	high	N/A	0.68	1	1	0	0	-4.06	5.66
464	OD	0			14	2.5	1	3	N/A	N/A	0.62	1	1	1	0	-0.99	1.72
465	OS	0			15	2.25	1.75	3.125	N/A	N/A	0.75	1	0	1	0	-6.2	6.7
466	OD	0			18	-1.25	1.75	-0.375	normal	N/A	0.75	1	0	1	0	-3.05	1.51
467	OS	0			17	-1	0.5	-0.75	normal	N/A	0.69	1	0	1	0	-2.28	1.81
468	OD	0			17	-4.75	0.75	-4.375	N/A	N/A	0.66	1	0	0	0	1.18	1.36
469	OS	0			16	-4.75	0.75	-4.375	N/A	N/A	0.69	1	0	1	0	-0.3	1.48
470	OD	0			16	-0.5	0.5	-0.25	N/A	N/A	0.66	1	0	0	0	-2.34	2.65
471	OS	0			15	-1.25	0.5	-1	N/A	N/A	0.7	1	0	0	0	-1.68	1.58
472	OD	0			13	-2	0.25	-1.875	very low	N/A	0.72	1	1	1	0	-1.05	1.72
473	OS	0			12	-2.25	0.25	-2.125	very low	N/A	0.68	1	1	1	0	-1.76	1.96
474	OD	0			16	2	0.5	2.25	N/A	N/A	0.53	1	0	1	0	1.21	1.86
475	OS	0			17	3.25	0.5	3.5	N/A	N/A	0.58	1	1	0	0	-0.45	1.82
476	OS	0			19	-2		-2	N/A	N/A	0.73	1	1	0	0	N/A	N/A
477	OD	0			13	-3	3.25	-1.375	high	N/A	.8-.9	1	0	0	0	-13.46	9.93
478	OS	0			13			0	high	N/A	0.7	1	0	1	0	-0.29	1.31
479	OD	0			16	-9	0.75	-8.625	410	N/A	0.91	1	0	1	0	-7.75	8.41
480	OS	0			14	-8	sphere	-8	410	N/A	0.77	1	0	1	0	-3.22	1.51
481	OD	0			15	1.25	0.75	1.625	low	N/A	0.54	1	0	1	0	-4.29	2.71
482	OS	0			14	0.5		0.5	low	N/A	0.59	1	0	1	0	-3.73	1.87
483	OD	0			15	-0.75	0.5	-0.5	N/A	N/A	0.75	1	0	0	0	-0.79	2
484	OS	0			11	-1.75	0.5	-1.5	N/A	N/A	0.65	1	0	0	0	-2.53	2.73
485	OD	0			18	-6.25	2.5	-5	high	N/A	0.54	1	1	1	0	-0.15	1.58
486	OS	0			19	-7.25	2	-6.25	high	N/A	0.59	1	1	1	0	-1.5	4.91
487	OD	0			9	6		6	low	23.85	0.84	1	1	0	0	-7.24	6.32
488	OS	0			10	6		6	low	24.01	0.7	1	1	0	0	-2.77	2.71
489	OD	0			13	3		3	600	N/A	0.82	1	0	0	0	-5.82	3.54
490	OS	0			14	3		3	600	N/A	0.73	1	1	0	0	-2.66	2.74
491	OD	0			18	1.25		1.25	low	N/A	0.7	1	0	0	0	-1.03	2.84
492	OS	0			18	0.5		0.5	low	N/A	0.65	1	0	0	0	-0.16	1.81
493	OD	0			16	N/A	N/A	20/20 cc	N/A	N/A	0.32	1	1	0	0	0.91	1.37
494	OS	0			11	N/A	N/A	CF at 3' sc	N/A	N/A	0.99	1	1	0	0	-27.06	8.35
495	OD	0			11	-2.5	1.5	-1.75	low	N/A	0.84	1	0	0	0	-21.14	12.02
496	OS	0			13	-0.25	0.25	-0.125	low	N/A	0.68	1	0	0	0	-0.71	2.48
497	OD	0			22	-13.75	0.75	-13.375	N/A	N/A	0.81	1	0	0	0	-18.46	10.52
498	OS	0			16	-10.5	1.75	-9.625	N/A	N/A	0.74	1	0	0	0	-8.37	9.15
499	OD	0			15	-2.25	2	-1.25	N/A	N/A	0.83	1	0	0	0	-0.86	2.17
500	OS	0			13	-4.75	3	-3.25	N/A	N/A	0.79	1	1	0	0	-2.19	4.02
501	OD	0			24	1.25		1.25	thin	N/A	0.78	1	1	0	0	-20.92	11.29
502	OS	0			20	3.5		3.5	thin	N/A	0.84	1	1	0	0	-33.16	2.1
503	OD	0			13	1	0.25	1.125	low	N/A	0.85	1	1	0	0	-12.12	11.07
504	OS	0			11	1.25	1	1.75	low	N/A	0.5	1	1	1	0	-0.72	2.42
505	OD	0			19	-1	0.5	-0.75	low	N/A	0.68	1	0	0	0	-1.84	2.06
506	OS	0			17	-0.75	0.25	-0.625	low	N/A	0.7	1	0	0	0	-2.6	1.81
507	OD	0			12	-1.5	1	-1	normal	31.91	0.9	1	0	1	0	-7.71	6.76
508	OS	0			11	-0.5	1	0	normal	31.94	0.75	1	0	0	0	-4.67	2.92
509	OD	0			19	-1	sphere	-1	average	N/A	0.69	1	1	0	0	0.64	1.55
510	OS	0			21	-1	0.75	-0.625	average	N/A	0.64	1	0	1	0	0.15	1.8
511	OD	0			22	-7	5.5	-4.25	N/A	N/A	0.7	1	0	0	0	-5.72	2.28
512	OS	0			N/A	-9	3.25	-7.375	N/A	N/A	0.35	1	0	0	0	0.27	2.5
513	OD	0			16	-2.5	0.75	-2.125	N/A	25.42	0.78	1	0	0	0	0.96	1.27
514	OS	0			16	-2.5	1	-2	N/A	25.36	0.77	1	0	0	0	0.93	1.74
515	OD	0			16	-3.75	1	-3.25	low	N/A	0.62	1	0	0	0	-6.24	9.21
516	OS	0			16	-2.25	1	-1.75	low	N/A	0.47	1	0	0	0	-0.59	1.76
517	OD	0			5	-2.75	0.75	-2.375	low	N/A	0.65	1	1	0	0	-8.09	8.78
518	OS	0			14	-2.25	2	-1.25	low	N/A	0.6	1	1	0	0	-0.89	1.76
519	OD	0			21	2.25	0.75	2.625	N/A	N/A	0.7	1	0	0	0	-0.61	1.57
520	OS	0			23	2	0.75	2.375	N/A	N/A	0.72	1	0	0	0	-1.15	2.31
521	OD	0			14	2.5		2.5	N/A	N/A	0.65	1	1	0	0	-3.92	4.78
522	OS	0			11	2.5		2.5	N/A	N/A	0.8	1	0	0	0	-5.66	4.1
523	OD	0			10	-1.25	0.75	-0.875	low	N/A	0.7	1	0	0	0	-3.47	2.22
524	OS	0			10	-2.5	1	-2	low	N/A	2.9	1	0	0	0	-0.78	1.39
525	OD	0			6	plano	0	0	N/A	N/A	0.9	1	1	0	0	-18.81	8.92
526	OS	0			8	-2.25	1	-1.75	N/A	N/A	0.9	1	0	0	0	-19.78	7.55
527	OD	0			30	N/A	N/A	20/25 -2	N/A	N/A	0.73	1	0	0	0	-0.8	2.27
528	OS	0			28	N/A	N/A	20/40 -2	N/A	N/A	0.66	1	0	0	0	-0.2	1.44
529	OS	0			18	-1.5	4.5	0.75	N/A	N/A	0.62	1	0	0	0	-9.7	6.98
530	OD	0			15	-4.75	0.5	-4.5	N/A	26.57	0.63	1	0	0	0	-1.93	5.76
531	OS	0			14	-5.75	1.25	-5.125	N/A	26.67	0.61	1	0	0	0	-10.08	12.28
532	OD	0			18	-0.5	1	0	high	N/A	0.56	1	0	1	0	-0.58	1.66
533	OD	0			15	-6.25	1.5	-5.5	N/A	N/A	0.64	1	0	0	0	-8.18	8.59
534	OS	0			16	-5.5	1.75	-4.625	N/A	N/A	0.76	1	0	0	0	-10.05	8.98
535	OD	0			16	-4.5	1.5	-3.75	N/A	N/A	0.85	1	0	0	0	-6.6	3.93
536	OS	0			17	-3	1	-2.5	N/A	N/A	0.79	1	1	0	0	-2.8	1.89
537	OD	0			11	-5	0.5	-4.75	low	N/A	0.61	1	0	1	0	-8.4	12
538	OS	0			10	-5.25	0.5	-5	low	N/A	0.76	1	0	0	0	-17	13.42
539	OD	0			16	-1.5	0.25	-1.375	550	N/A	0.5	1	0	0	0	-10.28	12.1
540	OS	0			16	-0.25	0.5	0	550	N/A	0.53	1	0	0	0	-2.3	3.35
541	OD	0			19	-1.75		-1.75	avg/thick	N/A	0.69	1	0	0	0	-1.32	2.82
542	OS	0			18	-1.25		-1.25	avg/thick	N/A	0.62	1	0	0	0	-1.89	3.72
543	OD	0			15	1.75	0.5	2	N/A	N/A	0.76	1	0	1	0	-0.74	1.83
544	OS	0			16	2	0.25	2.125	N/A	N/A	0.67	1	0	0	1	-1.2	1.92
545	OD	0			14	2.5		2.5	519	N/A	0.66	1	0	1	0	0.54	1.47
546	OS	0			13	2.5		2.5	519	N/A	0.62	1	0	0	0	1.81	1.58
547	OD	0			16	-0.5	0.25	-0.375	N/A	21.55	0.48	1	0	0	0	-1.8	2.15
548	OS	0			16	-0.25	1.25	0.375	N/A	23.42	0.46	1	0	1	0	-2.24	2.18
549	OD	0			12	-4.5	1	-4	normal	N/A	0.93	1	0	0	0	-18.19	13.31
550	OS	0			18	-4.25	1	-3.75	normal	N/A	0.89	1	0	0	0	-22.54	10.49
551	OD	0			19	-5.75	1.25	-5.125	N/A	N/A	0.65	1	0	1	0	2.25	1.58
552	OS	0			19	-5.75	1	-5.25	N/A	N/A	0.66	1	0	1	0	1.98	1.51
553	OD	0			9	N/A	N/A	20/25 -3	N/A	N/A	0.64	1	0	1	0	-1.37	1.85
554	OS	0			10	N/A	N/A	20/30 ph	N/A	N/A	0.64	1	0	1	0	-5.21	2.33
555	OD	0			24	-5.25	0.5	-5	490	N/A	0.58	1	0	1	0	N/A	N/A
556	OS	0			28	-4	1.25	-3.375	490	N/A	0.34	1	0	1	0	N/A	N/A
557	OD	0			21	0.75	1	1.25	low	N/A	0.72	1	0	0	0	-0.75	3.12
558	OS	0			23	1.5	0.75	1.875	low	N/A	0.8	1	0	0	0	-10.27	10.92
559	OD	0			13	-3.75	1.25	-3.125	N/A	N/A	0.69	1	0	0	0	-2.43	1.93
560	OS	0			14	-5	1	-4.5	N/A	N/A	0.72	1	0	0	0	-2.24	1.29
561	OD	0			17	-2	0.25	-1.875	low	N/A	0.65	1	0	0	1	0.01	1.44
562	OS	0			15	-0.75		-0.75	low	N/A	0.73	1	0	1	0	-2.7	2.5
563	OD	0			13	-1.25	0.5	-1	N/A	25.14	0.84	1	0	0	0	-28.07	5.42
564	OS	0			16	-0.75	0.5	-0.5	N/A	25.11	0.81	1	0	0	0	-18.94	8.05
565	OD	0			16	plano	1.25	0.625	N/A	N/A	0.71	1	0	0	0	-10.72	3.45
566	OS	0			15	0.75	1	1.25	N/A	N/A	0.51	1	0	1	0	-2.24	4.92
567	OD	0			18	-3.75	2.25	-2.625	average	N/A	.8-.9	1	1	0	0	-3.86	6.47
568	OS	0			14	-8.25	1.5	-7.5	average	N/A	0.7	1	1	0	0	-0.57	1.7
569	OD	0			17	1.75		1.75	average	N/A	0.77	1	0	1	0	1.4	1.78
570	OS	0			16	1.75		1.75	average	N/A	0.73	1	0	1	0	1.32	1.56
571	OS	0			15	-2.75	1.25	-2.125	640	N/A	0.9	1	0	1	0	-6.47	5.17
572	OD	0			10	N/A	N/A	20/30 -2	528	N/A	0.6	1	0	0	0	-2.32	2.31
573	OS	0			12	N/A	N/A	20/50 -2	522	N/A	0	1	0	0	0	-3.26	3.33
574	OD	0			22	1.75		1.75	high	N/A	0.71	1	0	0	0	-0.78	2.16
575	OS	0			20	1.75		1.75	high	N/A	0.68	1	0	0	0	0.64	2.18
576	OD	0			15	-1.25	1.5	-0.5	N/A	N/A	0.71	1	1	1	0	0.07	1.47
577	OS	0			17	-1.5	1	-1	N/A	N/A	0.76	1	1	1	0	-1.98	1.85
578	OD	0			12	plano		0	N/A	N/A	0.82	1	0	0	0	-13.32	14
579	OS	0			13	plano	0.75	0.375	N/A	N/A	0.75	1	0	1	0	-3.85	10.7
580	OD	0			16	N/A	N/A	20/20 -2	average	N/A	0.78	1	0	1	0	0.15	1.86
581	OS	0			15	N/A	N/A	20/25 -1	average	N/A	0.75	1	0	1	0	-2.11	2.18
582	OD	0			20	-2.25	1.25	-1.625	average	N/A	0.34	1	1	0	0	-2.69	1.69
583	OS	0			15	-1	0.25	-0.875	average	N/A	0.45	1	0	0	0	0	1.74
584	OD	0			20	2.5	0.5	2.75	N/A	N/A	0.66	1	0	0	0	N/A	N/A
585	OS	0			21	2.5	0.5	2.75	N/A	N/A	0.82	1	1	0	0	N/A	N/A
586	OD	0			11	N/A	N/A	20/20 -3	N/A	N/A	0.15	1	0	1	0	N/A	N/A
587	OS	0			27	N/A	N/A	20/80 ph	N/A	N/A	0.99	1	0	0	0	N/A	N/A
588	OD	0			11	-2.25	0.25	-2.125	low	N/A	0.78	1	0	1	0	-8.27	9.33
589	OS	0			16	-4.5		-4.5	low	N/A	0.64	1	1	0	0	-5.17	3.8
590	OD	0			14	1	0.5	1.25	556	N/A	0.83	1	0	0	0	-3.28	3.74
591	OS	0			13	1	0.25	1.125	554	N/A	0.77	1	0	0	0	-4.46	8.42
592	OD	0			11	-1	0.5	-0.75	N/A	N/A	0.73	1	0	1	0	-17.56	10.95
593	OS	0			15	-0.25	0.25	-0.125	N/A	N/A	0.52	1	0	1	0	0.81	2.09
594	OD	0			14	-4.25	4	-2.25	N/A	N/A	0.39	1	0	1	0	N/A	N/A
595	OS	0			14		-4.5	4	N/A	N/A	0.58	1	0	1	0	N/A	N/A
596	OD	0			18	-0.5	1.75	0.375	high	N/A	0.68	1	1	0	0	-3.04	1.83
597	OS	0			15	plano		0	high	N/A	0.67	1	0	0	0	-8.99	5.71
598	OD	0			13	0.5	0.5	0.75	N/A	N/A	0.63	1	0	0	0	1.17	1.24
599	OS	0			7	0.75	0.25	0.875	N/A	N/A	0.31	1	0	0	0	-0.38	2.35
600	OD	0			14	-4.5	1.25	-3.875	N/A	N/A	0.87	1	0	0	0	-15.33	11.66
601	OS	0			13	-4.75	0.75	-4.375	N/A	N/A	0.71	1	0	0	0	-1.03	1.98
602	OD	0			16	1.5		1.5	average	N/A	0.71	1	0	0	0	0.86	2.22
603	OS	0			17	1.5		1.5	average	N/A	0.72	1	0	0	0	1.01	2
604	OD	0			16	-5.5		-5.5	N/A	N/A	0.37	1	0	1	0	N/A	N/A
605	OS	0			14	plano		0	N/A	N/A	0.28	1	0	0	0	N/A	N/A
606	OD	0			12	2.25	0.25	2.375	N/A	N/A	0.61	1	0	1	0	-4.22	3.94
607	OS	0			11	2	0.25	2.125	N/A	27.84	0.67	1	0	1	0	-4.41	3.22
608	OD	0			17	-5.5	0.75	-5.125	N/A	26.78	0.54	1	1	0	0	-1.03	1.77
609	OS	0			18	-6.25	0.75	-5.875	N/A	26.8	0.75	1	1	0	0	-4.35	2.69
610	OD	0			16	-4	2.25	-2.875	N/A	N/A	0.71	1	0	1	0	0.83	1.78
611	OS	0			18	-3	0.25	-2.875	N/A	N/A	0.74	1	0	0	0	N/A	N/A
612	OD	0			17	-1	0.5	-0.75	high	N/A	0.67	1	0	1	0	1.65	1.62
613	OS	0			22	-0.5	0.5	-0.25	high	N/A	0.64	1	0	1	0	1.98	2.49
614	OD	0			13	N/A	N/A	20/25 -2	N/A	N/A	0.09	1	0	1	0	-0.5	2.05
615	OS	0			13	N/A	N/A	20/25 ph	N/A	N/A	0.31	1	0	1	0	-0.93	2.04
616	OD	0			13	1.5	1.25	2.125	normal	N/A	0.83	1	0	0	0	-0.95	1.53
617	OS	0			14	0.5	1.5	1.25	normal	N/A	0.87	1	0	0	0	-5.42	7.74
618	OD	0			15	-0.25	0.5	0	N/A	N/A	0.68	1	0	0	0	1.69	1.86
619	OS	0			17	-1	sphere	-1	N/A	N/A	0.75	1	0	1	0	0.17	3.88
620	OD	0			15	plano	0.5	0.25	N/A	N/A	0.74	1	1	0	0	-2.9	3.96
621	OS	0			15	-1	0.5	-0.75	N/A	N/A	0.76	1	1	0	0	-4.11	4.01
622	OD	0			15	-3.75	2.75	-2.375	N/A	N/A	0.81	1	0	0	0	-1.66	2.25
623	OS	0			14	-2.5	1.75	-1.625	N/A	N/A	0.83	1	0	0	0	-6.04	8.34
624	OD	0			12	-1.25	1.25	-0.625	normal	N/A	0.82	1	1	0	0	-2.96	6.57
625	OS	0			13	-1.75	1.5	-1	normal	N/A	0.77	1	1	0	0	-2.82	6.02
626	OD	0			13	1.25		1.25	avg/thin	N/A	0.8	1	0	1	0	0.7	2.1
627	OS	0			12	1.25		1.25	avg/thin	N/A	0.8	1	0	1	0	-1.67	2.07
628	OD	0			13	-2.25	1.25	-1.625	N/A	N/A	0.71	1	0	1	0	-1	2.13
629	OS	0			12	-2	1	-1.5	N/A	N/A	0.71	1	0	1	0	-0.5	1.52
630	OD	0			18	-6.25	sphere	-6.25	thin	N/A	0.7	1	1	1	0	-0.77	1.4
631	OS	0			16	-6	sphere	-6	thin	N/A	0.71	1	0	1	0	-0.82	1.92
632	OD	0			17	-2.75	2.75	-1.375	N/A	N/A	0.83	1	1	0	0	-16.43	9.2
633	OS	0			16	-1.5	2.25	-0.375	N/A	N/A	0.78	1	1	0	0	-12.95	9.33
634	OD	0			16	plano	1	0.5	average	N/A	0.6	1	0	1	0	0.83	2.02
635	OS	0			14	1.25	0.75	1.625	average	N/A	0.57	1	0	1	0	0.23	2.12
636	OD	0			9	1.25	0.5	1.5	low	N/A	0.58	1	0	1	0	0.12	2.39
637	OS	0			12	1.5	0.25	1.625	low	N/A	0.46	1	0	1	0	0.2	2.24
638	OD	0			20	N/A	N/A	20/20 -1	N/A	N/A	0.8	1	0	1	0	1.97	1.64
639	OS	0			21	N/A	N/A	20/20 -2	N/A	N/A	0.83	1	0	1	0	-0.22	2.19
640	OD	0			10	-1	1	-0.5	N/A	N/A	0.76	1	1	1	0	-6.43	4.05
641	OS	0			11	-2.25	0.75	-1.875	N/A	N/A	0.73	1	1	0	0	-3.53	3..34
642	OD	0			14	0.5	0.75	0.875	N/A	N/A	0.65	1	0	1	0	-5.03	4.62
643	OS	0			16	-1.5	0.5	-1.25	N/A	N/A	0.64	1	0	1	0	-2.43	1.83
644	OD	0			19	-0.5	0.5	-0.25	low	N/A	0.85	1	0	0	0	-13.36	8.94
645	OS	0			16	-1.5		-1.5	low	N/A	0.9	1	1	0	0	-19.84	11.8
646	OD	0			18	-2.25	1.75	-1.375	<555	N/A	0.72	1	0	1	0	-1.57	1.72
647	OS	0			18	-2.25	2	-1.25	<555	N/A	0.63	1	0	0	0	0.15	1.62
648	OD	0			13	-1.25	0.25	-1.125	average	N/A	0.68	1	0	1	0	2.36	1.42
649	OS	0			14	-1.5	0.5	-1.25	average	N/A	0.72	1	0	1	0	2.45	1.29
650	OD	0			20	N/A	N/A	20/20 -3 ph	low	N/A	0.9	1	0	1	0	-6.45	3.58
651	OS	0			25	N/A	N/A	20/15	low	N/A	0.9	1	0	1	0	-4.1	1.95
652	OD	0			12	plano	1.5	0.75	thick	23.98	0.76	1	0	0	0	N/A	N/A
653	OS	0			14	1.5		1.5	thick	24.19	0.77	1	0	0	0	N/A	N/A
654	OD	0			12	-3.75	1.25	-3.125	N/A	N/A	0.74	1	1	0	0	-9.28	9.41
655	OS	0			10	-3.25	2	-2.25	N/A	N/A	0.76	1	0	0	0	-9.87	10.96
656	OD	0			17	-6.75	0.75	-6.375	N/A	N/A	0.66	1	1	1	0	-1.13	1.94
657	OS	0			9	-7.25	1.25	-6.625	N/A	N/A	0.52	1	1	1	0	-2.97	3.76
658	OD	0			18	1.5	0.5	1.75	thick	N/A	0.72	1	0	1	0	0.35	1.62
659	OS	0			16	1.25	1.25	1.875	thick	N/A	0.71	1	1	1	0	-0.84	1.51
660	OD	0			18	1	0.25	1.125	508	N/A	0.61	1	0	1	0	-2.4	2.27
661	OS	0			18	1		1	508	N/A	0.55	1	0	1	0	-2.31	2.28
662	OS	0			13	-6.5	0.5	-6.25	N/A	29.65	0.57	1	1	0	0	-12.98	4.61
663	OD	0			21	-6.75	1.25	-6.125	high	N/A	0.66	1	0	1	0	1.11	1.13
664	OS	0			22	-7.25	1	-6.75	high	N/A	0.64	1	0	1	0	0.22	1.63
665	OD	0			14	-0.25	0.5	0	N/A	N/A	0.75	1	0	1	0	0.3	1.63
666	OS	0			15	-2.75	2.75	-1.375	N/A	N/A	0.72	1	0	0	0	1.11	1.17
667	OD	0			14	-0.75	1.25	-0.125	N/A	N/A	0.8	1	1	0	0	0.24	2.06
668	OS	0			17	-1	0.75	-0.625	N/A	N/A	0.9	1	0	0	0	-15.97	13.47
669	OD	0			14	-5.75	2	-4.75	556	N/A	0.67	1	0	1	0	-0.51	1.21
670	OS	0			11	-4.25	1.5	-3.5	572	N/A	0.46	1	0	1	0	-0.36	1.55
671	OD	0			19	-2.25	0.5	-2	average	N/A	0.66	1	0	1	0	-1.77	1.61
672	OS	0			19	-2		-2	average	N/A	0.7	1	1	1	0	-1.08	2.03
673	OD	0			35	N/A	N/A	20/20 -3	very low	N/A	0.86	1	0	1	0	-22.52	13.62
674	OS	0			24	N/A	N/A	20/20 -1	very low	N/A	0.74	1	0	1	0	-2.68	2.84
675	OD	0			23	1.5	0.5	1.75	high	N/A	0.72	1	0	0	0	-1.74	2.26
676	OS	0			15	0.75	0.13	0.815	high	N/A	0.8	1	1	0	0	-6.07	6.8
677	OD	0			17	plano	1	0.5	N/A	N/A	0.08	1	0	1	0	-0.05	1.84
678	OS	0			16	0.25	0.75	0.625	N/A	N/A	0.31	1	0	1	0	-0.85	2.01
679	OD	0			18	-1	1.5	-0.25	low	N/A	0.85	1	1	0	0	-2.28	3.19
680	OS	0			16	-1.5	2.5	-0.25	low	N/A	0.79	1	1	0	0	-2.63	5.06
681	OD	0			11	N/A	N/A	20/20	average	N/A	0.85	1	0	1	0	-4.61	4.34
682	OS	0			13	N/A	N/A	20/25 ph	average	N/A	0.81	1	0	1	0	-0.98	1.72
683	OD	0			12	-3.75	1.25	-3.125	N/A	N/A	0.47	1	1	0	0	-14.58	12.87
684	OS	0			16	-2.75	0.75	-2.375	N/A	N/A	0.44	1	0	0	0	0.53	1.58
685	OD	0			14	N/A	N/A	20/20	normal	N/A	0.56	1	0	0	0	0.75	1.73
686	OS	0			12	N/A	N/A	20/50 -3	thin	N/A	0.82	1	0	0	0	-18.02	11.69
687	OD	0			9	-2.25		-2.25	N/A	N/A	0.87	1	0	1	0	-7.47	8.84
688	OS	0			9	-1	0.75	-0.625	N/A	N/A	0.89	1	0	0	0	-20.58	13.21
689	OD	0			13	plano		0	avg/thin	N/A	0.8	1	0	0	0	N/A	N/A
690	OS	0			11	-1		-1	avg/thin	N/A	0.85	1	1	0	0	-9.46	6.19
691	OD	0			17	-2.5	sphere	-2.5	634	N/A	0.55	1	0	1	0	1.41	2.39
692	OS	0			17	-3.5	sphere	-3.5	627	N/A	0.55	1	0	1	0	0.31	2.64
693	OD	0			16	-0.75		-0.75	N/A	N/A	0.8	1	0	1	0	-8.16	8.68
694	OS	0			16	-0.75		-0.75	N/A	N/A	0.81	1	0	1	0	-28.16	9.49
695	OD	0			18	2.25	0.25	2.375	N/A	N/A	0.73	1	0	1	0	-4.06	6.3
696	OS	0			17	2.25	0.5	2.5	N/A	N/A	0.74	1	0	0	0	-8.77	11.32
697	OD	0			12	3.75	0.75	4.125	N/A	33.23	0.52	1	0	0	0	-6.93	8.74
698	OS	0			14	balance		0	N/A	30.42	0.11	1	0	0	0	N/A	N/A
699	OD	0			18	0.75	1.25	1.375	high	N/A	0.67	1	0	1	0	-2.15	2.14
700	OS	0			18	0.25	0.75	0.625	hgih	N/A	0.72	1	0	1	0	0.02	2.22
701	OD	0			17	-0.25	0.5	0	N/A	N/A	0.82	1	1	1	0	-11.86	8.23
702	OS	0			15	-0.5	0.5	-0.25	N/A	N/A	0.82	1	1	1	0	-3.71	3.69
703	OD	0			15	plano		0	normal	N/A	0.76	1	1	0	0	-1.94	2.06
704	OS	0			20	-0.5	1	0	normal	N/A	0.75	1	1	0	0	-2.05	1.59
705	OD	0			22	6	1.75	6.875	low	N/A	0.1	1	0	1	0	-27.62	7.72
706	OS	0			18	1.75	0.75	2.125	low	N/A	0.1	1	0	1	0	-2.58	2.47
707	OD	0			17	-5.5	2.25	-4.375	N/A	N/A	0.77	1	1	0	0	-3.03	2.54
708	OS	0			17	-4.5	1	-4	N/A	N/A	0.79	1	0	0	0	-4.22	4.22
709	OD	0			12	-5	2	-4	N/A	N/A	0.6	1	0	0	0	-4.63	1.87
710	OS	0			12	-4.5	1	-4	N/A	N/A	0.68	1	0	0	0	-4	1.44
711	OD	0			11	N/A	N/A	20/20 -1	very low	N/A	0.62	1	0	1	0	-0.6	2.14
712	OS	0			11	N/A	N/A	20/20	very low	N/A	0.62	1	0	1	0	0.28	1.81
713	OD	0			20	-1.25		-1.25	0.75	N/A	0.75	1	0	0	0	-3.54	2.01
714	OS	0			20	-1.5	0.5	-1.25	0.75	N/A	0.75	1	0	0	0	-4.22	3.17
715	OD	0			11	-5.75	1.25	-5.125	610	N/A	0.9	1	1	0	0	-16.95	14.75
716	OS	0			13	-3.25	0.75	-2.875	610	N/A	0.8	1	1	1	0	-5	9.62
717	OD	0			10	-2	3	-0.5	high	N/A	0.55	1	1	0	0	N/A	N/A
718	OS	0			12	-1.75	4	0.25	high	N/A	0.56	1	1	0	0	N/A	N/A
719	OD	0			35	1	sphere	1	N/A	23.48	0.3	1	0	0	0	N/A	N/A
720	OS	0			N/A	1	sphere	1	N/A	23.39	0.65	1	0	0	0	N/A	N/A
721	OD	0			16	-2.5	0.25	-2.375	N/A	N/A	0.75	1	0	1	0	0.5	1.48
722	OS	0			14	-2	0.25	-1.875	N/A	N/A	0.75	1	0	1	0	1.05	1.39
723	OD	0			11	3.5		0	low	N/A	0.9	1	0	0	0	-21.87	12.35
724	OS	0			12	3.5		0	low	N/A	0.87	1	1	0	0	-15.76	11.75
725	OD	0			16	-8	0.5	-7.75	normal	N/A	0.67	1	1	1	0	-0.56	2.29
726	OS	0			16	-6.75	0.75	-6.375	normal	N/A	0.76	1	1	1	0	-0.261	2.85
727	OD	0			33	1.25		1.25	high	N/A	0.99	1	0	0	0	N/A	N/A
728	OS	0			17	-3.75	5	-1.25	high	N/A	0.77	1	0	0	0	N/A	N/A
729	OD	0			15	N/A	N/A	20/20 +2	524	N/A	0.44	1	1	0	0	-7.44	10.75
730	OS	0			16	N/A	N/A	20/20 -2	524	N/A	0.49	1	1	1	0	-3.33	2.36
731	OD	0			17	plano			N/A	N/A	0.78	1	0	1	0	1.25	1.14
732	OS	0			18	-1.25	sphere	-1.25	N/A	N/A	0.76	1	0	1	0	0.41	1.24
733	OD	0			21	0.75	1	1.25	N/A	21.89	0.67	1	0	1	0	N/A	N/A
734	OS	0			22	0.25	0.75	0.625	N/A	21.81	0.71	1	0	1	0	N/A	N/A
735	OD	0			21	N/A	N/A	20/25 ph	500	N/A	0.49	1	0	0	0	-0.56	1.31
736	OS	0			22	N/A	N/A	20/25 ph	500	N/A	0.36	1	0	0	0	-0.21	1.89
737	OD	0			14	1.75	1.25	2.375	high	22.06	0.63	1	1	0	0	0.83	2.63
738	OS	0			15	3.5	sphere	3.5	high	22.06	0.63	1	1	0	0	1.12	2.49
739	OD	0			10	1.25	1.25	1.875	high	N/A	0.75	1	0	1	0	-8.06	10.09
740	OS	0			12	1.5	1	2	hgih	N/A	0.77	1	0	0	0	-22.49	12.05
741	OD	0			15	-0.5	0.75	-0.125	high	N/A	0.9	1	0	0	0	-8.1	6.14
742	OS	0			17	1.5		1.5	high	N/A	.75-.8	1	0	1	0	-4.58	2.12
743	OD	0			18	-2.5	1.25	-1.875	high	N/A	0.53	1	0	0	0	-1.38	2.38
744	OS	0			15	-2.5	1	-2	high	N/A	0.64	1	0	0	0	-3.73	3.94
745	OD	0			16	-20	2.5	-18.75	sl. Low	N/A	0.83	1	1	1	0	-2.46	2.53
746	OD	0			13	-2.75	0.75	-2.375	N/A	N/A	0.75	1	0	0	0	0.25	1.62
747	OS	0			14	-3.5		-3.5	N/A	N/A	0.72	1	0	1	0	0.31	1.91
748	OD	0			20	-5.25		-5.25	N/A	N/A	0.61	1	0	1	0	0.2	1.16
749	OS	0			20	-5		-5	N/A	N/A	0.65	1	0	1	0	-0.31	1.38
750	OD	0			14	plano		0	N/A	N/A	0.3	1	0	0	0	-0.77	1.38
751	OS	0			17	-0.25	1.5	0.5	N/A	N/A	0.3	1	1	0	0	-0.2	1.38
752	OD	0			14	-12.25	0.75	-11.875	normal	N/A	0.58	1	0	0	0	-2.03	5.64
753	OS	0			14	-11		-11	normal	N/A	0.54	1	0	1	0	-0.58	1.33
754	OD	0			17	-1.25	0.5	-1	N/A	N/A	0.5	1	0	0	0	-14.52	12.07
755	OS	0			14	-0.75		-0.75	N/A	N/A	0.1	1	0	1	0	-2.14	4.44
756	OD	0			14	-0.25		-0.25	N/A	N/A	0.83	1	0	0	0	-0.16	2.25
757	OS	0			16	-0.5	0.75	-0.125	N/A	N/A	0.79	1	0	0	0	1.12	1.66
758	OD	0			15	-7	0.75	-6.625	N/A	N/A	0.74	1	0	0	0	-8.82	11.65
759	OS	0			14	-6	0.25	-5.875	N/A	N/A	0.71	1	0	0	0	-9.86	10.34
760	OD	0			19	-11.25	1.5	-10.5	low	N/A	0.08	1	0	1	0	-2.36	1.63
761	OS	0			19	-11.5	1.75	-10.625	low	N/A	0.07	1	0	1	0	-2.73	2.02
762	OD	0			20	3.5	0.5	3.75	N/A	N/A	0.57	1	0	1	0	0.41	1.39
763	OS	0			21	3.5	0.75	3.875	N/A	N/A	0.61	1	0	0	0	-1.35	1.9
764	OD	0			21	2.5		2.5	sl. thin	N/A	0.81	1	1	0	0	-2.53	2.28
765	OS	0			16	2.5		2.5	sl. thin	N/A	0.76	1	1	1	0	-1.09	1.62
766	OD	0			15	0.25	1	0.75	N/A	N/A	0.9	1	0	1	0	-22.5	12.38
767	OS	0			17	3.25	1.5	4	N/A	N/A	0.6	1	0	1	0	10.69	7.5
768	OD	0			18	-1.75	1.25	-1.125	low	N/A	0.72	1	0	0	0	-0.99	1.61
769	OS	0			13	-3	1.75	-2.125	low	N/A	0.71	1	0	0	0	-4.31	6.44
770	OD	0			24	3.5	1.25	4.125	average	N/A	0.66	1	0	0	0	-1.38	1.69
771	OD	0			27	0.75	0.5	1	thin	N/A	0.34	1	0	0	0	-3.83	2.67
772	OS	0			13	2		2	thin	N/A	0.34	1	0	0	0	-1.09	1.73
773	OD	0			18	-9.75	2.5	-8.5	high	N/A	0.21	1	0	0	0	-1.25	3.34
774	OS	0			19	-10	4	-8	high	N/A	0.28	1	1	1	0	-1.78	2.96
775	OD	0			14	1.25		1.25	N/A	N/A	0.62	1	0	0	0	-0.84	2.48
776	OS	0			14	1.25		1.25	N /A	N/A	0.63	1	0	1	0	-0.82	2.24
777	OD	0			13	-7	1	-6.5	N/A	N/A	0.39	1	0	0	0	-7.39	6.43
778	OS	0			14	-6	1.25	-5.375	N/A	N/A	0.71	1	1	0	0	-21.26	12.43
779	OD	0			16	-1.5	1	-1	thick	N/A	0.66	1	0	0	0	-0.1	1.93
780	OS	0			16	-0.5	0.75	-0.125	thick	N/A	0.69	1	0	0	0	-0.93	2.26
781	OD	0			24	-7.25	1.75	-6.375	low	N/A	0.51	1	0	0	0	-0.07	1.91
782	OS	0			28	-6	1	-5.5	low	N/A	0.43	1	0	1	0	0.77	2.13
783	OD	0			15	-3.25	1	-2.75	N/A	N/A	0.59	1	0	1	0	-2.25	4.5
784	OS	0			14	-3.5	0.75	-3.125	N/A	N/A	0.65	1	0	1	0	-2	5.07
785	OD	0			16	2.75	0.75	3.125	N/A	N/A	0.72	1	0	0	0	-5.29	2.46
786	OS	0			18	2.25	0.75	2.625	N/A	N/A	0.73	1	0	0	0	-4.42	4.48
787	OD	0			21	-0.75	0.5	-0.5	low	N/A	0.73	1	1	0	0	-7.84	3.95
788	OS	0			6	-1.75	0.1	-1.7	low	N/A	0.63	1	0	0	0	-8.46	5.69
789	OD	0			15	2.75	0.5	3	558	N/A	0.77	1	0	1	0	-5.82	3.74
790	OS	0			15	2	1	2.5	555	N/A	0.75	1	0	1	0	-6.9	3.98
791	OD	0			12	0.75	1.75	1.625	mod. thick	N/A	0.78	1	0	0	0	-2.23	2.2
792	OS	0			12	1.5	1.5	2.25	mod. thick	N/A	0.75	1	1	0	0	-3.06	8.51
793	OD	0			16	-1	1	-0.5	N/A	N/A	0.62	1	0	0	0	-0.53	2.66
794	OS	0			15	-1.75	1.25	-1.125	N/A	N/A	0.68	1	1	0	0	-4.18	5.38
795	OD	0			14	plano		0	low	N/A	0.91	1	1	0	0	-26.64	8.92
796	OS	0			6	-0.5		-0.5	low	N/A	0.82	1	0	1	0	-23.4	13.14
797	OD	0			20	-1		-1	high	N/A	0.63	1	0	0	0	N/A	N/A
798	OD	0			18	N/A	N/A	20/25 -3	avg/thick	N/A	0.58	1	0	1	0	-2.03	3.03
799	OS	0			17	N/A	N/A	20/40 -1	avg/thick	N/A	0.57	1	0	0	0	-11.15	12.59
800	OD	0			13	-6	0.75	-5.625	N/A	N/A	0.62	1	1	0	0	-6.76	5.52
801	OS	0			13	-6.5	0.25	-6.375	N/A	N/A	0.54	1	1	0	0	-10.09	9.54
802	OD	0			18	-4	0.5	-3.75	N/A	N/A	0.73	1	0	1	0	1.68	1.38
803	OS	0			18	-4	0.75	-3.625	N/A	N/A	0.7	1	1	1	0	1.5	1.99
804	OD	0			15	-0.75		-0.75	N/A	N/A	0.62	1	0	1	0	-30.81	2.52
805	OS	0			15	plano		0	N/A	N/A	0.62	1	0	1	0	-31.63	2.24
806	OD	0			16	-0.5	1.25	0.125	average	N/A	0.88	1	0	1	0	-3.05	2.63
807	OS	0			14	-0.5	1.5	0.25	average	N/A	0.81	1	0	0	0	-1.67	1.94
808	OD	0			15	1	0.25	1.125	N/A	N/A	0.59	1	1	0	0	1.07	2.15
809	OS	0			13	1	0.25	1.125	N/A	N/A	0.74	1	1	1	0	-8.43	9.07
810	OD	0			21	2.25	0.5	2.5	above avg.	N/A	0.72	1	1	0	0	-1.85	1.65
811	OS	0			20	1	0.75	1.375	above avg.	N/A	0.71	1	1	0	0	-1.18	1.98
812	OD	0			11	-0.75	1.5	0	average	N/A	0.77	1	0	0	0	-2.8	3.89
813	OS	0			12	-0.75	0.5	-0.5	average	N/A	0.77	1	0	0	0	-3.15	2.38
814	OD	0			32	-15		-15	low	N/A	0.63	1	0	0	0	-5.93	3.02
815	OS	0			23	-16.75		-16.75	low	N/A	0.92	1	0	0	0	-12.95	4.89
816	OD	0			16	-1.75	0.5	-1.5	thick	N/A	0.59	1	0	1	0	-4.9	3.64
817	OS	0			22	0.25	0.5	0.5	thick	N/A	0.75	1	0	1	0	-7.65	6.03
818	OD	0			30	-7.5	0.25	-7.375	high	N/A	0.1	1	0	0	0	1.1	1.23
819	OS	0			16	-6.75	0.5	-6.5	high	N/A	0.13	1	1	0	0	-2.89	5.51
820	OD	0			22	-4.5	1	-4	high	25.3	0.61	1	1	0	0	-0.99	1.32
821	OS	0			24	-4.25	1	-3.75	high	25.57	0.57	1	1	0	0	-1.09	1.61
822	OD	0			14	-3.25	0.5	-3	N/A	N/A	0.16	1	0	1	0	N/A	N/A
823	OS	0			14	-3.25	0.25	-3.125	N/A	N/A	0.2	1	0	1	0	N/A	N/A
824	OD	0			22	-1.25	0.5	-1	low	N/A	0.84	1	0	1	0	-16.38	12.72
825	OS	0			16	-1	2	0	low	N/A	0.77	1	0	1	0	-4.03	2.12
826	OD	0			14	plano	1.75	0.875	N/A	N/A	0.61	1	1	0	0	1.35	2.22
827	OS	0			19	-1	sphere	-1	N/A	N/A	0.77	1	1	0	0	-8.01	9.87
828	OD	0			14	-11.25	1	-10.75	thinner	N/A	0.68	1	1	1	0	-11.32	12.72
829	OS	0			14	-11	sphere	-11	thinner	N/A	0.62	1	0	1	0	-2.78	1.96
830	OD	0			19	-0.5	sphere	-0.5	N/A	23.76	0.86	1	1	1	0	-17.42	13.42
831	OS	0			17	-0.75	sphere	-0.75	N/A	23.22	0.81	1	1	1	0	-14.57	14.52
832	OD	0			14	-5	0.5	-4.75	average	N/A	0.66	1	0	1	0	0.31	1.51
833	OS	0			15	-5.5	1	-5	average	N/A	0.81	1	0	1	0	-5.2	7
834	OD	0			11	plano	1	0.5	low	N/A	0.89	1	0	0	0	-21.78	13.56
835	OS	0			12	1.5	1	2	low	N/A	0.85	1	0	0	0	-13.54	11.56
836	OS	0			18	-1.5	0.25	-1.375	below avg	N/A	0.82	1	0	1	0	-4.35	5.69
837	OD	0			21	-1.25		-1.25	average	N/A	0.64	1	0	1	0	-8.63	2.39
838	OS	0			21	-1		-1	average	N/A	0.73	1	1	1	0	-7.58	2.48
839	OD	0			15	-2.5	1	-2	sl. thin	N/A	0.7	1	1	0	0	0.66	1.27
840	OS	0			14	-3.25	1.5	-2.5	sl. thin	N/A	0.6	1	1	1	0	0.3	1.33
841	OD	0			19	-5	1	-4.5	N/A	25.47	0.41	1	0	0	0	-0.53	1.93
842	OS	0			16	-3.25	0.75	-2.875	N/A	24.99	0.51	1	0	0	0	-7.24	8.86
843	OD	0			16	2	1	2.5	high	N/A	0.95	1	0	0	0	-21.3	12.26
844	OS	0			18	2.5	0.5	2.75	high	N/A	.95+	1	0	0	0	-33.67	1.63
845	OD	0			13	0.75	0.5	1	normal	22.53	0.68	1	0	0	0	-0.43	1.83
846	OS	0			16	-2.25	sphere	-2.25	normal	23.19	0.64	1	0	0	0	-3.89	2.24
847	OD	0			16	-1.75	0.25	-1.625	N/A	N/A	0.22	1	0	0	0	1.18	1.47
848	OS	0			18	-3.5	0.5	-3.25	N/A	N/A	0.34	1	0	0	0	1.38	1.34
849	OD	0			13	-13	1.75	-12.125	mod. thick	N/A	0.75	1	1	0	0	-1.82	3.46
850	OS	0			15	-13.5	0.75	-13.125	mod. thick	N/A	0.9	1	0	0	0	-11.53	10.49
851	OD	0			15	N/A	N/A	20/15 -2	N/A	N/A	0.7	1	0	1	0	0.08	1.36
852	OS	0			14	N/A	N/A	20/15 -1	N/A	N/A	0.76	1	0	1	0	-0.53	1.66
853	OD	0			18	1	0.5	1.25	N/A	N/A	0.62	1	0	1	0	-9.76	7.28
854	OS	0			20	1.25	0.25	1.375	N/A	N/A	0.72	1	0	1	0	-8.36	9.17
855	OS	0			14	-3.5	0.75	-3.125	normal	N/A	0.76	1	0	1	0	-19.65	13.42
856	OD	0			12	-1.25	1.75	-0.375	thicker	N/A	0.8	1	0	1	0	-23.68	11.3
857	OS	0			12	-1	1.75	-0.125	thicker	N/A	0.8	1	0	0	0	-4.52	8.99
858	OD	0			12	0.5	1	1	526	N/A	0.75	1	0	1	0	-0.34	2.18
859	OS	0			15	0.5	1	1	532	N/A	0.75	1	0	1	0	-0.59	2.39
860	OD	0			16	-4.25	0.75	-3.875	530	N/A	0.73	1	0	1	0	-8.59	13.17
861	OS	0			16	-2.75	0.5	-2.5	530	N/A	0.63	1	0	1	0	-1	1.67
862	OD	0			11	1.25		1.25	low	N/A	0.84	1	0	0	0	-3.78	10.71
863	OS	0			13	1.25		1.25	low	N/A	0.87	1	1	0	0	-2.08	7.76
864	OD	0			19	0		0	N/A	23.49	0.46	1	0	1	0	N/A	N/A
865	OS	0			20	-2.25		-2.25	N/A	23.04	0.67	1	0	0	0	N/A	N/A
866	OD	0			19	-1.75	4	0.25	low	N/A	0.39	1	1	0	0	-1.24	1.88
867	OS	0			19	-1.5	3	0	low	N/A	0.69	1	0	0	0	-5.61	3.86
868	OD	0			18	-4.75	0.25	-4.625	normal	N/A	0.8	1	0	1	0	0.61	2.17
869	OS	0			18	-4.75	sphere	-4.75	normal	N/A	0.8	1	0	0	0	0.34	3.77
870	OD	0			21	0.75		0.75	525	N/A	0.85	1	0	1	0	-11.33	8.9
871	OS	0			22	0.5		0.5	523	N/A	0.9	1	0	0	0	-16.08	11.65
872	OD	0			14	-2	0.5	-1.75	lower than avg.	N/A	0.73	1	1	1	0	-1.55	2
873	OS	0			14	-1.75	0.25	-1.625	lower than avg.	N/A	0.64	1	0	1	0	-1.85	1.95
874	OD	0			17	-10	1.5	-9.25	high	27.06	0.6	1	0	0	0	0.93	2.42
875	OS	0			17	-10	2.5	-8.75	high	26.71	0.5	1	0	0	0	-3.88	2.3
876	OD	0			16	-0.5	0.5	-0.25	low	N/A	0.6	1	0	0	0	-1.45	1.61
877	OS	0			15	-0.5	1	0	low	N/A	0.4	1	0	0	0	-3.2	4.26
878	OD	0			11	4	1	4.5	low	N/A	0.56	1	0	1	0	1.23	1.63
879	OS	0			11	3.75	1.25	4.375	low	N/A	0.6	1	0	1	0	0.01	1.49
880	OD	0			17	-9.5		-9.5	N/A	N/A	0.48	1	1	0	0	-23.62	12.08
881	OS	0			16	-10	0.25	-9.875	N/A	N/A	0.84	1	1	0	0	-9.77	10.97
882	OD	0			16	-1	0.5	-0.75	thick	N/A	0.73	1	0	1	0	-3.39	1.73
883	OS	0			18	-2		-2	thick	N/A	0.58	1	0	1	0	-2.02	2.34
884	OD	0			15	N/A	N/A	20/15	N/A	N/A	0.58	1	0	1	0	-0.66	2.04
885	OS	0			19	N/A	N/A	20/30 -1	N/A	N/A	0.87	1	0	0	0	-21.51	10.03
886	OD	0			15	0.75	0.25	0.875	N/A	N/A	0.7	1	0	1	0	-1.43	2.12
887	OS	0			15	0.5	1	1	N/A	N/A	0.73	1	0	1	0	0.36	1.62
888	OD	0			18	1.75	0.5	2	normal	N/A	0.67	1	0	1	0	-0.67	1.94
889	OS	0			19	1.25	0.25	1.375	normal	N/A	0.7	1	0	1	0	-0.31	1.62
890	OD	0			12	-2	1.5	-1.25	N/A	N/A	0.77	1	1	0	0	-17.72	11.99
891	OS	0			12	plano		0	N/A	N/A	0.29	1	0	0	0	-1.57	1.56
892	OD	0			24	N/A	N/A	20/20 - 1	high	N/A	0.51	1	0	1	0	0.97	1.46
893	OS	0			22	N/A	N/A	20/20 -3	high	N/A	0.61	1	0	1	0	0.3	1.3
894	OD	0			21	-0.75	1	-0.25	590	N/A	0.2	1	0	1	0	3.71	3.05
895	OS	0			21	-0.75	1	-0.25	590	N/A	0.2	1	0	1	0	1.86	3.52
896	OD	0			15	-2.75	1.75	-1.875	N/A	N/A	0.68	1	1	0	0	-8.62	6
897	OS	0			16	-0.75	0.75	-0.375	N/A	N/A	0.71	1	0	1	0	-7.55	6.39
898	OD	0			26	N/A	N/A	20/20 -2	average	N/A	0.86	1	0	1	0	-11.82	11.28
899	OS	0			25	N/A	N/A	20/20 -1	average	N/A	0.86	1	0	1	0	-10.6	11.14
900	OD	0			21	N/A	N/A	20/25 ph	above avg.	N/A	0.55	1	0	1	0	N/A	N/A
901	OS	0			28	N/A	N/A	20/40 +2	above avg.	N/A	0.32	1	0	1	0	N/A	N/A
902	OD	0			14	-4	3.5	-2.25	avg/ thick	N/A	0.59	1	0	1	0	0.18	1.4
903	OS	0			15	-4	2.25	-2.875	avg/thick	N/A	0.6	1	1	1	0	-1.53	1.89
904	OD	0			21	plano	sphere	0	N/A	N/A	0.85	1	0	0	0	-16.33	8.43
905	OS	0			20	-1.75	0.75	-1.375	N/A	N/A	0.75	1	1	0	0	N/A	N/A
906	OD	0			22	3.5	1.5	4.25	N/A	N/A	0.2	1	0	0	0	-0.3	2.2
907	OS	0			22	1	0.5	1.25	N/A	N/A	0.3	1	0	0	0	-0.43	1.39
908	OD	0			6	plano	0.5	0.25	low	N/A	0.79	1	1	0	0	-5.84	10.1
909	OS	0			7	0.25	0.25	0.375	low	N/A	0.79	1	0	0	0	-7.69	12.1
910	OD	0			15	-6	1.75	-5.125	N/A	25.84	0.68	1	0	0	0	-1.02	5.06
911	OS	0			14	-2.75	0.75	-2.375	N/A	25.44	0.59	1	0	0	0	1.25	1.61
912	OD	0			30	N/A	N/A	20/20 - 3	N/A	N/A	0.72	1	0	0	0	-4.79	2.09
913	OS	0			39	N/A	N/A	20/30 ph	N/A	N/A	0.68	1	0	1	0	-6.21	2.42
914	OD	0			25	plano		0	average	23.25	0.26	1	0	0	0	1.49	1.17
915	OS	0			23	-1		-1	average	23.17	0.32	1	0	0	0	1.76	1.22
916	OD	0			19	2.25	1.25	2.875	N/A	23.94	N/A	1	0	0	0	0.49	1.39
917	OD	0			14	-1	0.75	-0.625	N/A	N/A	0.6	1	0	0	0	0.06	1.36
918	OS	0			15	-3	0.25	-2.875	N/A	N/A	0.57	1	0	0	0	-0.94	1.72
919	OD	0			18	N/A	N/A	20/15 -1	N/A	N/A	0.75	1	0	0	0	-6.17	2.54
920	OS	0			17	N/A	N/A	20/200	N/A	N/A	0.58	1	0	1	0	N/A	N/A
921	OD	0			15	-1	1	-0.5	thin	N/A	excavation	1	0	0	0	N/A	N/A
922	OS	0			12	-1	1	-0.5	thin	N/A	excavation	1	0	0	0	N/A	N/A
923	OD	0			14	3.5		3.5	high	N/A	0.6	1	0	0	0	-2.93	3.43
924	OD	0			19	-1.25	2.5	0	sl. thin	N/A	0.79	1	0	0	0	-0.89	1.71
925	OS	0			14	-1.75	1.75	-0.875	sl. thin	N/A	0.77	1	0	0	0	-0.94	4.2
926	OD	0			13	-9	1.5	-8.25	average	N/A	0.66	1	0	0	0	-1.55	3.14
927	OS	0			13	-7.5	1.5	-6.75	average	N/A	0.22	1	0	1	0	-1	2.12
928	OD	0			28	-2	1	-1.5	N/A	N/A	N/A/ .9+	1	0	0	0	-13.86	12.43
929	OS	0			23	-2	1	-1.5	N/A	N/A	0.84	1	0	1	0	-15.99	13.82
930	OD	0			16	balance		0	normal	20.3	0.52	1	1	0	0	-20.34	12.24
931	OS	0			12	-1.75	0.25	-1.625	normal	21	0.43	1	0	0	0	-15.17	9.77
932	OD	0			16	-1.5	sphere	-1.5	N/A	23.83	0.57	1	0	0	0	-11.24	15.45
933	OS	0			17	-2.25	sphere	-2.25	N/A	24.12	0.63	1	0	0	0	-4.48	7.57
934	OD	0			18	1.5	1	2	high	N/A	0.54	1	0	1	0	0.61	1.33
935	OS	0			19	1.75	1	2.25	high	N/A	0.48	1	0	1	0	-0.02	1.37
936	OS	0			15	-3.25	0.75	-2.875	N/A	N/A	0.83	1	0	0	0	-2.21	3.32
937	OD	0			12	-4	1.5	-3.25	normal	N/A	0.91	1	0	0	0	-0.3	1.92
938	OS	0			14	-9.5	0.5	-9.25	normal	N/A	0.89	1	0	0	0	-2.52	2.23
939	OD	0			15	-2	0.75	-1.625	N/A	N/A	0.6	1	1	0	0	-4.94	3.61
940	OS	0			18	-1	1.75	-0.125	N/A	N/A	0.65	1	1	0	0	-5.78	2.54
941	OS	0			14	N/A	N/A	20/30 -2+3	N/A	N/A	0.28	1	0	0	0	-4.81	2.21
942	OD	0			7	-1.25	2	-0.25	low	N/A	0.78	1	0	1	0	-20.57	15.86
943	OS	0			13	plano		0	low	N/A	0.85	1	0	1	0	-16.58	16.62
944	OD	0			14	-0.75	0.25	-0.625	average	N/A	0.71	1	0	0	0	-0.64	1.64
945	OD	0			26	-1	sphere	-1	high	N/A	0.48	1	0	0	0	-1.58	4.22
946	OS	0			24	-1	sphere	-1	high	N/A	0.76	1	0	0	0	-15.97	14.76
947	OD	0			12	N/A	N/A	20/40 ph	N/A	N/A	0.8	1	0	1	0	-9.19	6.54
948	OS	0			12	N/A	N/A	20/40 ph	N/A	N/A	0.8	1	1	1	0	-6.45	5.15
949	OD	0			14	9.75	0	9.75	high	N/A	0.77	1	0	1	0	-11.64	10.86
950	OS	0			17	10.25	0.5	10.5	high	N/A	0.29	1	0	1	0	-2.07	1.16
951	OS	0			18	0.25	1.25	0.875	high	N/A	0.55	1	0	1	0	-5.34	1.95
952	OD	0			21	plano	sphere	0	N/A	N/A	0.85	1	0	0	0	-11.94	11.01
953	OS	0			20	-1.75	0.75	-1.375	N/A	N/A	0.75	1	1	0	0		N/A
954	OD	0			22	-1.25	0.5	-1	low	N/A	0.84	1	0	1	0	N/A	N/A
955	OS	0			16	-1	2	0	low	N/A	0.77	1	0	1	0	N/A	N/A
956	OS	0			16	2	1	2.5	high	N/A	0.95	1	0	0	0	-15.34	8.32
957	OD	0			13				high	N/A	0.6	1	0	0	0	N/A	N/A
958	OS	0			13	plano			normal	N/A	0.6	1	0	0	0	-0.41	1.81
959	OS	0			16	-2.25	sphere	-2.25	normal	N/A	0.64	1	0	0	0	-3.54	2.2
960	OD	0			20	N/A	N/A	20/20 -1	N/A	N/A	0.8	1	0	1	0	1.97	1.64
961	OS	0			21	N/A	N/A	20/20 -2	N/A	N/A	0.83	1	0	1	0	-2.43	1.83
962	OD	0			10	-1	1	-0.5	N/A	N/A	0.76	1	1	1	0	-6.34	3.54
963	OD	0			11	Plano			N/A	N/A	0.73	1	1	0	0	-0.22	2.19
964	OS	0			14	0.5	0.75	0.875	N/A	N/A	0.65	1	0	1	0	-8.76	4.44
965	OD	0			16	-1.5	0.5	-1.25	N/A	N/A	0.64	1	0	1	0	N/A	N/A
966	OS	0			18	-1	1.5	-0.25	low	N/A	0.85	1	0	0	0	-12.22	7.54
967	OS	0			16	-1.5	2.5	-0.25	low	N/A	0.7	1	1	0	0	-2.63	5.06
968	OD	0			11	N/A	N/A	20/20	average	N/A	0.85	1	0	1	0	-4.61	4.34
969	OS	0			13	N/A	N/A		average	N/A	0.6	1	0	1	0	-1.43	1.52
970	OS	0			12	N/A	N/A		N/A	N/A	0.6	1	1	0	0	-2.32	2.53
971	OD	0			16	-2.75	0.75	-2.375	N/A	N/A	0.5	1	0	0	0	0.53	1.58
972	OS	0			14	N/A	N/A		normal	N/A	0.5	1	0	0	0	0.75	1.73
973	OD	0			11	Plano			N/A	N/A	0.73	1	1	0	0	-0.22	2.19
974	OD	0			14	0.5	0.75	0.875	N/A	N/A	0.65	1	0	1	0	-7.98	6.87
975	OS	0			16	N/A	N/A		N/A	N/A	0.64	1	0	1	0	-7.53	2.43
976	OD	0			18	N/A	N/A		low	N/A	0.85	1	1	0	0	-10.23	6.54
977	OS	0			16	-1.5	2.5	-0.25	low	N/A	0.7	1	1	0	0	-2.63	5.06
978	OD	0			11	Plano			N/A	N/A	0.73	1	1	0	0	-6.4	2.19
979	OS	0			14	0.5	0.75	0.875	N/A	N/A	0.65	1	0	1	0	-5.03	4.62

## Sheet: Schisis
	Age/		Diagnosis	Eye	IOP	Layers Involved	Prior Surgery/Laser	Glaucoma	Other ocular pathology	VA	CCT (um)	SEQ (D)	VF MD (dB)	VF PSD	Axial length (mm)	CD Ratio	PPA
SNO	Gender	Gender						Meds
1	54	M	Pigmentary OAG	OD	15	INL, ONL, OPL	None	Latanoprost	None	20/20	574	-8.75	-1.99	1.88	NA	0.7	Yes
2	78	M	POAG	OD	11	NFL, IPL, , OPL, ONL	CE	Bimatoprost, Dorzolamide	None	20/20	513	-0.75	0.09	2.02	22.71	0.75	No
3	78	M	POAG	OS	11	INL, ONL	CE	Bimatoprost, dorzolamide	None	20/30	511	-1.25	-2.19	2.19	22.76	0.75	No
4	66	M	OHT	OD	19	NFL, INL, ONL	None	None	None	20/25	531	-7.75	-0.08	2.98	NA	0.4	Yes
5	66	M	OHT	OS	19	NFL, INL, ONL	None	None	None	20/25	543	-8.5	-0.86	1.88	NA	0.3	Yes
6	69	M	OHT	OD	17	NFL, ONL	None	Latanoprost	None	20/40	573	-3.5	-1.02	2.26	27.74	0.8	No
7	69	F	OHT	OS	14	NFL, ONL	CE	Latanoprost	None	20/25	574	-4.5	-2.83	1.98	27.9	0.8	No
8	67	M	CNAG	OS	17	INL, ONL, OPL	LPI, peripheral iridoplasty	Brimonidine, Brinzolamide, Latanoprost	None	20/20	577	4.75	-1.53	2.49	NA	0.1	No
9	67	M	POAG	OD	14	INL, ONL,	Trab, Tube Shunt	Brimonidine	None	20/30	536	-2.75	-21.03	11.47	NA	0.8	Yes
10	67	M	POAG	OS	11	NFL, INL, ONL	Trab	None	None	20/30	544	-3.25	-19.65	13.42	NA	0.7	Yes
11	80	F	POAG	OS	10	NFL, INL, ONL	Trab	Timolol, Latanoprost	None	20/70	470	-3.25	-27.61	8.98	25.01	0.9	Yes
